1 The Elephant in the room: What can we learn from California regarding the use of sport hunting  
2 of pumas (*Puma concolor*) as a management tool?

3

4 John W. Laundré<sup>1</sup> and Christopher Papouchis<sup>2</sup>

5 <sup>1</sup>Western Oregon University, Monmouth, OR 97361

6 <sup>2</sup> California State University, Sacramento, CA 95819

7 [launjohn@hotmail.com](mailto:launjohn@hotmail.com), [chris.papouchis@csus.edu](mailto:chris.papouchis@csus.edu)

8 Corresponding Author: John W. Laundré, 8070 NE Barberry Dr., Adair Village, OR 97330,  
9 [launjohn@hotmail.com](mailto:launjohn@hotmail.com)

10

11 Short title: Validity of puma hunting as a management tool

## 12 **Abstract**

13 Pumas (*Puma concolor*) in 10 western states of the U.S. have been managed through the use of a  
14 sport hunt. The rationale for this management technique is that puma populations needed to be  
15 hunted to reduce threats to human safety, their livestock, and wild ungulate populations. We  
16 evaluated these claims with the state of California as a control, which has prohibited sport  
17 hunting since 1972. We tested four hypotheses: 1) Sport hunting reduces puma density, 2) Sport  
18 hunting reduces problematic puma-human encounters, 3) Sport hunting reduces puma predation  
19 on livestock, and 4) Sport hunting reduces the impact of puma predation on wild ungulate  
20 numbers. Results indicated: 1) Puma densities did not differ between California and sport  
21 hunting states, 2) California was the 3<sup>rd</sup> lowest in per capita puma-human incidents. 3) The per  
22 capita loss of sheep was significantly lower ( $t = 5.7$ ,  $P < 0.001$ ) and the per capita loss of cattle in  
23 California did not differ significantly, from the other 10 states ( $P = 0.13$ ). 4). Changes in annual  
24 deer populations in California correlated with changes in other states ( $F = 95.4$ ,  $P < 0.001$ ,  $R^2 =$   
25  $0.68$ ) and average deer densities in California did not differ significantly from the other states.  
26 We concluded that sport hunting of pumas as a management tool has not produced the outcomes  
27 sought by wildlife managers and may even exacerbate conflicts between pumas and humans. It is  
28 suggested that state agencies re-assess the use of sport hunting as a management tool for pumas.

## 29 **Introduction**

30 Pumas (*Puma concolor*), like the other predators in North America, were viewed by European  
31 colonialists and their descendants as threats to human safety and domestic livestock as well as  
32 competition for wild ungulates, mainly deer (*Odocoileus* sp) and elk (*Cervus elepus*).  
33 Consequently, they were eliminated from much of their range in the Eastern and Midwestern

34 United States by the mid to late 1800's. In the West, unrestricted trapping and hunting of pumas  
35 continued until the 1960's, with bounties being offered for their removal. By the mid 1900's, the  
36 scientific evidence began to demonstrate the ecological value of large predators, including  
37 pumas, in ecosystems [1,2]. Additionally, many scientists and citizens began to question the  
38 ethics of uncontrolled killing of pumas and began to advocate for some degree of protection [3].  
39 However, there remained the perception among wildlife managers that some level of control was  
40 still necessary to prevent puma populations from growing to socially unacceptable levels where  
41 they might threaten human safety, livestock interests, and population objectives for big game,  
42 principally deer [4] (<https://idfg.idaho.gov/wildlife/predator-management>). In response, in the  
43 1970's ten of the 12 states where pumas still occurred classified them as a game species and  
44 established sport hunting seasons [4]. The two exceptions of this management approach are  
45 Texas, where pumas are completely unprotected and can be hunted without limit, and California,  
46 where pumas are fully protected from sport hunting and managed through relocation or killing of  
47 individuals puma that pose a threat to public safety, livestock or threaten the viability of bighorn  
48 sheep populations (<https://www.wildlife.ca.gov/keep-me-wild/lion>, Accessed on February 28,  
49 [2018, https://www.wildlife.ca.gov/Conservation/Mammals/Mountain-Lion/Depredation](https://www.wildlife.ca.gov/Conservation/Mammals/Mountain-Lion/Depredation),  
50 Accessed on February 28, 2018).

51 Though providing some degree of protection to pumas, e.g. closed seasons, the intent of a sport  
52 season on puma was to continue to control their populations to address the three main concerns  
53 of public safety, livestock and ungulate protection [5, 6]. As a result, the primary management  
54 objective (MO) for sport hunting of pumas in these ten western states was to usually set "bag  
55 limits" similar to historic bounty kill levels, which never exceeded 1,000 animals per year.  
56 However, since the enactment of sport hunting, the number of pumas killed annually by sport

57 hunters has steadily increased. By 2016, the 10-state average kill rate of pumas was 390 per  
58 state or over 3,900 individuals per year (Fig. 1). Of these, 3400, or > 89%, are killed by sport  
59 hunters and the rest for specific threats to human safety, livestock depredation, or accidents  
60 (Unpublished agency reports). This sustained high-rate of puma killing has elicited questions as  
61 to whether sport hunting actually achieves its purported management goals [7].

62 **Fig. 1. Number of puma killed per year in California compared to the mean for the 10**  
63 **western states with a sport hunt of puma.** The numbers for California represent animals  
64 specifically identified as conflicting with human safety or livestock depredation and other  
65 causes. The numbers for the 10 other states represent animals killed by sport hunters (80-90%),  
66 ones specifically identified as conflicting with human safety or livestock depredation, and other  
67 causes.

68 Most state game agencies rely on the North American Model for Wildlife Conservation (NAM)  
69 for guiding their management policies [8]. The NAM explicitly advocates the use of science and  
70 research in setting and justifying wildlife management policy [8,9,10,11]. Nevertheless, one  
71 recent evaluation of hunt management in the United States and Canada found little adherence to  
72 science-based approaches [12]. Using the criteria of Artelle et al. [12], our assessment of  
73 available state management plans for pumas, indicates this to be the case for pumas in most of  
74 the western states. Additionally, there have been more recent calls for using science to evaluate  
75 the possible politicization of wildlife management decisions [13].

76 Regarding puma management, what does the science tell us? An increasing number of scientific  
77 studies have questioned the putative effectiveness of sport hunting to meet MO's of state  
78 agencies. Specifically, sport hunting of pumas might not reduce puma numbers [14], or result in

79 larger ungulate populations [15,16,17,18]. Several studies provide evidence that sport hunting  
80 increases the rate of puma interactions with people and livestock, thereby exacerbating the very  
81 problems it is intended to ameliorate [5,19, 20]. This growing body of data has placed doubt  
82 upon whether sport hunting is an effective management tool for pumas.

83 Employing the guidelines of adaptive management [4], it is appropriate to ask whether sport  
84 hunting has been successful in meeting management objectives over the ~ 45 years since it was  
85 initiated in the western U.S. In doing so, we identified four hypotheses that emerge from desired  
86 outcomes articulated by state management agencies. These are that 1) sport hunting will suppress  
87 puma populations, 2) sport hunting will reduce the number of problematic puma-human  
88 encounters; 3) sport hunting will reduce puma predation on domestic livestock, and 4) sport  
89 hunting will reduce the impact of puma predation on wild ungulate numbers, resulting in  
90 increased hunting opportunities for the sport hunt of ungulates.

91 Unfortunately, these hypotheses are difficult to test. In particular, as each of the 10 states have  
92 continued to rely on this management strategy, there is no “control” within or among those states  
93 other than to alter the number of pumas removed by the sport hunt. One state, Washington  
94 initiated a metapopulation style management program [21] where levels of killing of pumas were  
95 specifically set for designated management units [22]. As a result, it is in this state that  
96 researchers have been able to test some impacts of the sport hunt with the previously mentioned  
97 contradictory findings [5,14, 20]. However, except for these localized within state comparisons,  
98 we are not aware of any large scale, multi-state test of the sport hunting hypotheses.

99 Fortunately, the state of California offers a potential control for such a multi-state test. California  
100 has not used sport hunting to manage pumas over the same time period the other states have  
101 employed it. Instead, since 1972, California has handled puma-human conflicts and livestock

102 depredation on a case-by-case basis and specifically removes animals causing these conflicts.  
103 There is no killing of pumas specifically with regards to management of wild ungulate  
104 populations, except for threatened bighorn sheep (*Ovis canadensis*). As a consequence, over the  
105 same 45 years, the number of pumas killed in California has been consistently lower (< 150  
106 animals/year) than those states with sport hunting seasons on pumas. Thus, California would  
107 appear to be an appropriate “control” to compare against the “treatment” of a sport hunt. Since  
108 the remaining 10 states have sustained some level of sport hunting as a management strategy  
109 used over the time period, this comparison should enable a test of whether a sport hunt  
110 management strategy is achieving desired management goals.

111 The predictions specifically are that California, in the absence of a sport hunt of pumas should  
112 have 1) higher puma population densities; 2) a higher percent of problematic puma-human  
113 encounters; 3) higher percent of puma predation on domestic livestock; and 4) higher levels of  
114 puma predation on ungulate populations, resulting in lower hunting opportunities for sport  
115 hunting of ungulates, specifically deer. If these predictions are supported by the 40+ year data  
116 base available, then it would lend support to the hypothesis that sport hunting of pumas is a  
117 reasonable management strategy to obtain the desired results as stated above. If these predictions  
118 are not supported, then it would be reasonable to reject this hypothesis.

## 119 **Methods**

### 120 **Study Areas**

121 The 10 western states that use the sport hunt management strategy encompass most of the  
122 diverse habitat types found in the Western United States. Pumas are found throughout most of

123 these habitats but are rare in some of the harsher, dryer areas of each state. As a result, puma  
124 range in most states is less than the total area of the state. Most states have estimated the  
125 suitability and extent of different puma habitats in their states. Where state estimates were not  
126 available, we used recent data based on GIS analyses conducted by the Humane Society of the  
127 United States [7] (HSUS). As on average, HSUS habitat estimates only differed from state ones  
128 by approximately 4%, HSUS estimates were considered reliable enough to use when state  
129 estimates were lacking. Each state agency also has estimates of the amounts of appropriate deer  
130 (mule *O. hemionus* and white-tailed *O. virginianus*) habitat occurs within their boundaries. In  
131 most cases, puma and deer distributions overlap. California, which extends from the border with  
132 Mexico north to Oregon, contains most of the major ecosystems found in the West, from desert  
133 to high mountain forests [23]. As such, the impact of habitat differences on comparisons between  
134 California and the other 10 states could be considered minimal. The state also has identified the  
135 amount of appropriate puma and deer habitat. We used the estimates of total area of habitat for  
136 pumas and deer from each state when making density calculations.

## 137 **Data sources**

138 For all the comparisons made, we relied on data sets generated by either state or federal agencies  
139 or in the case of puma-human incidents, private organizations/individuals. These data sets have  
140 been maintained and published as open public records. We recognize that the reliability and  
141 scientific rigor of these data has been questioned. However, we argue that any testing of the sport  
142 hunting hypothesis should be done with the same data used to justify sport hunting as a  
143 management tool. We further argue that if these data are not considered rigorous enough to test  
144 these hypotheses, then they should not be used in making management decisions. However,  
145 many of these data sets, e.g. deer/puma population estimates and livestock depredation estimates,

146 are routinely used by state agencies in their management decisions, consequently, we used them  
147 to test the hypotheses regarding sport hunting presented here.

148 State and Federal data sets used in our analysis include 1) estimates of puma abundance, 2)  
149 numbers of pumas killed yearly by sport hunters and other causes, 3) estimates of deer  
150 populations, 4) estimates of the number of deer killed yearly by hunters, 5) estimates of the  
151 inventory of livestock, cattle and sheep, and 6) estimates of the number of livestock, cattle and  
152 sheep killed by pumas. Estimates of the number of puma-human incidents for each state have  
153 been maintained mainly by individuals and published either in the scientific literature [24] or  
154 available on the internet ([http://tchester.org/sgm/lists/lion\\_attacks.html](http://tchester.org/sgm/lists/lion_attacks.html)). These estimates were  
155 cross checked with inquires to state agencies as to records they had and updated as necessary.

156 In making comparisons, we first designated three basic stages in the evolution of the sport hunt  
157 of pumas. These are our designations based not on recognized agency policy but on our  
158 interpretation of documented puma population and sport kill data available. The first 20 years  
159 (~1970 – 1990) we refer to as the recovery period as puma populations were presumably still low  
160 from the decades of uncontrolled killing and the reported killing of animals by sport hunters was  
161 also low (~ 100-150 per state per year; Fig 1). By 1990, various studies indicated that puma  
162 populations in general had recuperated (the recovered period, 1990-1999) and were increasing  
163 and decreasing with available resources [25, 26]. The sport killing of puma was beginning to  
164 increase during this time and along with other human sources of mortality peaked at around 400  
165 per year per state in 2000, with 88% being from the sport hunt (Fig. 1). From approximately  
166 2000 to 2015 (the intense management period) total mortality of pumas remained between 300-  
167 400 animals per state per year, again 80-90% from the sport hunt. As puma populations and kill  
168 rates were low during the recovery period for the 10 states, inclusion of this timeframe in



169 comparisons might dilute effects of the sport hunt on the metrics we compared. Thus, most of  
170 our comparisons covered the last two periods as any effect of sport hunting should be more  
171 prominent, especially during the last 15 years of intense management.

## 172 **Standardizing the data**

173 Because the data used for deer and pumas come from a wide geographical area and at least 11  
174 different governmental agencies, we attempted to standardize the data in several ways. Most  
175 estimates of abundance or kill levels of deer and pumas were converted to population densities or  
176 kill densities (number killed/habitat area) based on the aforementioned estimated areas of  
177 appropriate habitat. Kill (= harvest) densities are commonly used by state agencies to set MO's  
178 for puma kill limits. Kill densities for puma were per 10,000 km<sup>2</sup> while kill densities for deer  
179 were per 100 km<sup>2</sup>. In some instances, we converted individual entries of a data set to the percent  
180 they were of the maximum entry of that data set. This “percentage of the maximum” facilitated  
181 comparing patterns of change as well as amplitude of that change among the diverse data sets.  
182 Estimates of puma mortality by all sources come from records maintained by state agencies.  
183 Total mortality levels were primarily (> 80 %) from sport hunting in the 10 states under  
184 consideration. However, as the level of mortality from California was just from all other causes,  
185 in making our comparisons we used the total number of pumas killed in a state rather than just  
186 the number killed by sport hunting. Also, some states include non-hunting deaths of pumas in  
187 setting their MO's.

188 To standardize livestock data across states, we converted the estimated number of animals killed  
189 by pumas to the percentages they were of total head inventory exposed to predation, e.g.  
190 livestock on open range. These data were retrieved from appropriate USDA documents

191 (<https://www.nass.usda.gov/>, Accessed on February 28, 2018). In these documents, total cattle  
192 inventory of a state included beef and dairy cattle. We subtracted the number of dairy cattle from  
193 the total to obtain an estimate of the number of beef cattle, animals most likely to be grazed on  
194 open range. There was a category of cattle on feed (= feedlots), but because these cattle could  
195 have come from anywhere, including other states, we did not use these estimates to adjust the  
196 inventory of beef cattle in a state. Consequently, we assumed all beef cattle were at least at  
197 sometimes grazed on open pasture exposed to possible predation by pumas. Data on calves were  
198 separately available. We did not use inventory data on cattle in Texas because most of the beef  
199 cattle in Texas are raised outside of current puma range and there were no estimates available for  
200 the number of beef cattle in the proportion of Texas where pumas occurred [27].

201 National levels of cattle and calf losses to predators, including pumas were reported yearly.  
202 However, there were only 5 years (1991, 1995, 2000, 2005, and 2010) where those losses were  
203 separated out by state and cause specific by predator

204 (<http://usda.mannlib.cornell.edu/MannUsda/viewDocumentInfo.do?documentID=1625>,  
205 [Accessed on February 28, 2018](#)). Thus, we used only these 5 years in our comparisons of per  
206 capita cattle and calf loss by pumas in California verses the other 10 states.

207 For sheep and lambs, the data categorized all sheep as sheep and lambs combined and also  
208 reported the annual lamb crop. The lamb crop was not identified as before or after docking but  
209 we assumed it was the same for all states. Because simply subtracting the lamb crop from the  
210 total sheep did not always provide us with credible estimates for adult sheep only, we used the  
211 categories of “all sheep” (adults and lambs) and “lamb crop” in our comparisons. We assumed  
212 all sheep and lambs were at sometimes grazed on open range and thus exposed to possible  
213 predation by pumas. We included Texas in some of the comparisons of levels of puma predation

214 on sheep and lambs because most sheep in Texas are raised within current puma range in that  
215 state [27].

216 Annual losses of sheep and lambs to predators, included pumas, were available yearly but there  
217 were only 5 years (1990, 1994, 1999, 2004, and 2014;  
218 <http://usda.mannlib.cornell.edu/MannUsda/viewDocumentInfo.do?documentID=1628>, Accessed  
219 [on February 28, 2018](#)), where the data were separated out by state and cause specific by predator.  
220 Thus, we used only these 5 years in our comparisons of percentage of sheep and lamb loss by  
221 pumas in California compared to the other 10 states.

222 Attack and mortality data from puma attacks on humans were available from before 1900.

223 However, as we were interested in the risk of humans since the early 1970's, we only used the  
224 data compiled since 1972, specifically during the recovered and intense killing periods. We  
225 estimated per capita (per million people) attack and mortality rates based on total human  
226 population estimates within each state for 2010, year of last census. As pumas are widely  
227 distributed over most western states and known to use exurban and suburban areas and many  
228 urban persons visit areas where pumas are, we used the total populations reported for each state.  
229 Texas, however, was excluded from any analysis of per capita incidents because we could not  
230 find population data on just the region of Texas where pumas occur. To include the more  
231 populated portion of the state where pumas were not found, would bias any comparisons.

232 When comparing deer data among states, we standardized the data relative to density ( $\#/km^2$ ). As  
233 deer abundance is estimated in similar ways across states, e.g. aerial surveys, we assumed the  
234 values reported, converted to densities, could be comparable across states. There could be some  
235 inherent differences in possible densities based on the proportion of habitat quality within a state,  
236 e.g. desert shrubland versus high altitude alpine vegetation. We address the effects of these

237 differences in the discussion of the results of our comparisons. Deer population densities and  
238 deer kill densities (by hunters) were calculated with agency published estimates of deer habitat  
239 within each state. Hunter success and the number of deer per hunter were calculated based on the  
240 number of licenses sold. In some cases, we again further standardized the data as percentages of  
241 the maximum value recorded to facilitate comparisons of trends.

242 In all the comparisons, data from California were evaluated directly to the equivalent data of the  
243 10 states with the sport hunt of pumas. Under this design, when appropriate, a t-test or its non-  
244 parametric equivalent for a single observation compared to a sample was used. In the case of any  
245 correlation analyses, any comparisons of correlation coefficients were made with appropriate  
246 statistical tests. If percentages were compared, they were first transformed with the  
247 recommended arcsine square root transformation [28]. Again, we recognize that others have  
248 argued that some of the data collected by agencies may not withstand the rigor for statistical  
249 analyses. However, we again argue that these are the only data available and are used by agency  
250 scientists in their analyses and decision making. As it are these data that the entire hypothesis for  
251 sport hunting rests, it should be these data that are used for the testing of that hypothesis.

## 252 **Results**

### 253 **Prediction 1: California will have higher puma population densities**

254 We first tested whether sport hunting has led to reduced puma populations or at least keep them  
255 lower than in the absence of a sport hunt (California). Puma are notoriously difficult to  
256 enumerate. However, all game agencies have at one time or another published estimates of puma  
257 numbers within their state. These estimates can vary widely and high and low values are usually

258 given. Unfortunately, the years of these estimates across states rarely coincide. For 2003,  
259 however, most agencies provided high and low estimates for pumas in their state [29]. As these  
260 estimates were provided after over 30 years of control (California) and treatment (10 states with  
261 sport hunt management), it would seem reasonable to compare densities between these states and  
262 California. We selected the high estimates as these values are commonly the default numbers  
263 cited by agencies when developing of management guidelines (Fig 2). As can be seen in Fig. 2,  
264 estimates of puma densities in California are not higher than, but are rather at the average of  
265 those states with sport hunting. Thus, the data do not support the hypothesis that after 30+ years,  
266 puma densities in states with sport hunting of pumas are significantly lower than in California. In  
267 fact, half of the sport hunting states reported puma densities higher than California.

268 **Fig. 2. Maximum estimated density of puma (animals/100 km<sup>2</sup>) in 2003 for 9 of the western**  
269 **states with a sport hunt of puma (no estimate was available for Wyoming) and California**  
270 **(dark column).** Estimates are based on data provided by agencies in Becker et al. (2003) and  
271 agency reported amounts of puma habitat within their boundaries. States are identified by their  
272 standard two-letter postal codes. The final column (AVE) is the average for the 9 states that have  
273 a sport hunt of puma.

274 Additional comparisons can be made for any of the states where later estimates are provided.  
275 The prediction is that after 12 years of intensive sport hunting, estimated puma population  
276 densities within a state should be lower than the 2003 estimate, while California should have no  
277 difference. California currently lists its mountain lion population to be between 4,000 and 6,000  
278 animals ([https://www.wildlife.ca.gov/Conservation/Mammals/Mountain-Lion/FAQ#359951241-](https://www.wildlife.ca.gov/Conservation/Mammals/Mountain-Lion/FAQ#359951241-how-many-mountain-lions-are-in-california)  
279 [how-many-mountain-lions-are-in-california](https://www.wildlife.ca.gov/Conservation/Mammals/Mountain-Lion/FAQ#359951241-how-many-mountain-lions-are-in-california), Accessed on February 28, 2018), which is the same  
280 reported for 2003. Arizona currently states it has between 2,500 and 3,000 pumas, placing the

281 current maximum number 500 above the maximum reported in 2003. Montana reports a 2017  
282 maximum estimate of 5,000 pumas [30], which represents a state-wide density of 2.8  
283 animals/100km<sup>2</sup>. Though there is no earlier statewide estimate to compare against, this density is  
284 only slightly below the 3.27 animals/100 km<sup>2</sup>) reported in one study area in western Montana  
285 [31], suggesting little change in total numbers since that time. New Mexico reported estimated its  
286 puma population at 3,123-4,269 animals in 2017 [32], a > 45% increase from the 2003 estimate  
287 of 2,150 animals. In sum, population estimates provided by agencies do not depict declining  
288 puma numbers in states with the sport killing of pumas. Over the same period, puma numbers  
289 have not reportedly increased in California where they are protected from sport hunting.  
290 Oregon, bordering California to the North, has published estimates of puma numbers since 1994.  
291 These estimates have been used by the Oregon Department of Fish and Wildlife to guide its  
292 puma management decisions, including sport hunting mortalities, which have steadily increased  
293 since 1994 (Fig. 3). We compared ODFW's puma annual population estimates with puma  
294 mortality levels and found a significant positive correlation ( $P < 0.001$ ,  $R^2 = 0.74$ ). In effect, it  
295 appears that the more animals that are killed in Oregon, the higher the reported population. This  
296 is the exact opposite that is predicted by the sport hunting hypothesis.

297 **Fig. 3. (a) Estimated population size and number of puma killed per year in Oregon as**  
298 **reported by Oregon Department of Fish and Wildlife**  
299 **(<http://www.dfw.state.or.us/wildlife/cougar/>) for 1994 to 2014.** Fig. 3b is the correlation of  
300 estimated population size with annual number of pumas killed.

301 In sum, based on the available data, we found no support of the hypothesis that sport hunting  
302 controls puma numbers below the level expected in the absence of this management practice.

303 **Prediction 2: California will have higher number of per capita**  
304 **puma-human incidents**

305 The test of the sport hunting model for this prediction is whether or not states using this  
306 management technique are experiencing fewer problematic puma-human interactions than  
307 California. We compared the per capita (per million persons) number of puma attacks and human  
308 fatalities that have occurred in California to the 10 states with sport hunting. The few overall  
309 numbers of such mortalities over the last 100 years makes statistical comparisons difficult.  
310 Consequently, we used the combined non-fatal and fatal attack data in our comparisons. In sum,  
311 as of 2016, 84 puma attacks on humans, non-fatal and fatal, have been recorded since 1972  
312 (beginning of sport hunting) in the twelve western states (Fig 4a). Most states reported 5 or fewer  
313 incidents over the 44 years. The highest was Washington with 16, followed by California with 15  
314 and Colorado with 13. Texas and Arizona each reported 8 incidents. On a per capita basis (per  
315 million persons), California ranked 3<sup>rd</sup> lowest with 0.40 attacks/million persons whereas  
316 Montana was highest with 7.1/million persons. The pattern does not change, including in  
317 reference to California, when we considered the time span of 2000-2015, the period of increased  
318 killing of pumas by sport hunting (Fig. 4a).

319 **Fig. 4. (a) per capita (per million humans) of cougar attacks on humans for the 10 western**  
320 **states with a sport hunt of puma and California. Per capita rates are based on total**  
321 **population (2010 census) of states.** Fig. 4b is per capita rate of cougar-human incidents,  
322 including attacks, threats, and livestock depredation for the 8 states reporting these data. Idaho,  
323 Nevada, and New Mexico do not maintain records of incident reports. States are identified by  
324 their standard two letter postal code.

325 Another indicator of puma-human conflicts is the number of incidents reported per year.  
326 California and seven of the 10 states with a sport hunt, recorded incidents that they considered as  
327 being serious enough to respond to (Fig. 4b). Some of these were actual attacks but many  
328 involved perceived threats to person or pets or livestock. California reported an average of 200  
329 incidents/yr since 2000. Though most of the states that use sport hunting had fewer than 100  
330 incidents, Washington (578/yr) and Oregon (328/yr), reported higher numbers of incidents than  
331 California. However, again, on a per capita basis, California ranked the lowest of the states  
332 reporting (Fig. 4b).

333 Annual incident data were available from the early-mid 1990's to 2018 for California and three  
334 other states (Oregon, Utah, and Washington). When we correlated puma kill density rates with  
335 incidents for these 4 states, there was no correlation for California and Oregon but there were  
336 positive correlations for Utah and Washington, indicating higher puma kill rates coincided with  
337 higher number of incidents (S1 Fig.).

338 Based on the attack and incident data, we found little support for the hypothesis that the sport  
339 hunting of pumas decreases the level of risk humans faced from pumas.

### 340 **Prediction 3: California will have higher percentage of puma** 341 **predation on domestic livestock**

342 Besides human safety, the second most frequently offered rationale for sport hunting of pumas is  
343 that it should reduce incidents of livestock depredation, principally cattle and sheep. To test this  
344 prediction, we used cause-specific depredation rates by pumas on livestock and compared among  
345 states the percentage loss from pumas based on the total number of head exposed to possible



346 puma predation (see Methods for details). We present means for the specific years when cause  
347 specific predation was reported.

### 348 *Cattle*

349 Overall cattle losses to pumas are extremely low, less than 0.2% of total head inventory. Figure  
350 5a ranks the 11 states relative to the average percentage of cattle lost to pumas during the 5 years  
351 reported (see Methods). California reported higher percent cattle losses than 8 states and lower  
352 losses than two states (Fig. 5a). These patterns were similar for calves (Fig. 5b). In comparing  
353 the percentage loss for the 5 years examined (See Methods) between California and the average  
354 loss for the other 10 states, there no significant differences for either cattle (paired  $t$ ,  $P = 0.56$ )  
355 or for calves ( $P = 0.132$ ).

356 **Fig. 5. Per capita (percent of total available herd inventory) predation of puma on cattle (a)**  
357 **and calves (b) in the 10 western states with a sport hunt of puma and California.** States are  
358 identified by their standard two letter postal code.

359 To further test whether sport hunting reduced cattle losses, we combined the data for percentage  
360 loss of calves from the 10 states with a sport hunt for the 5 years where data were available and  
361 correlated them with the puma kill density for the years previous to the sample years (Fig. 6a).  
362 Kill density of pumas was used to standardize the mortality rate across states. The prediction  
363 tested was that the percentage loss of calves would be negatively correlated with the number of  
364 pumas killed the previous year. The correlation was not significant (Fig. 6a). When we added the  
365 California data to the graph, but not the correlation, California had the lowest per area kill rates  
366 and also some of the lowest percentage loss of calves (Fig. 6a). The same analysis using cattle  
367 lost also showed no correlation.

368 **Fig. 6. (a) Correlation of percent calves killed by puma with puma kill density (# of puma**  
369 **killed per 10,000 km<sup>2</sup> of habitat) for combined data from 10 states with a sport hunt on**  
370 **puma.** Data from California are included in the graph for comparison but were not included in  
371 the correlation analysis. Fig. 6b is correlation of percent calves killed by pumas in Wyoming  
372 with number of pumas killed per year for 2004 to 2012. Data are from the 5 years where cause  
373 specific predator mortality were available (1991, 1995, 2000, 2005, & 2010).

374 One state, Wyoming, maintained cause specific depredation records for multiple years, including  
375 annually from 2004 to 2012. For each of those years, we compared the number of pumas  
376 removed the previous year with the percentage of cattle and calves killed for each year. The  
377 prediction is that if sport hunting puma is beneficial to cattle survival, there should be a negative  
378 correlation between the number of pumas removed one year and the percentage loss of cattle and  
379 calves the following year. The results indicated no relationship between cattle loss and puma kill  
380 rates. However, calf losses were positively correlated with the number of pumas killed the  
381 preceding year (Fig. 6b,  $P = 0.003$ ,  $R^2 = 0.58$ ). Higher calf losses were associated with higher  
382 numbers of puma killed, contrary to the prediction.

### 383 *Sheep*

384 The livestock inventory data did not clearly differentiate sheep and lambs but did present  
385 estimates for lamb crops. Sheep losses by pumas however, were clearly indicated as either adult  
386 sheep or lambs. As the inventory data were often incompatible, e.g. total sheep minus lamb crop  
387 did not equal an estimate of adult sheep, we only compared total puma depredation losses as a  
388 proportion of combined sheep and lambs and then puma depredation on lambs as a proportion of  
389 the lamb crop. For all states, including now Texas, data were available only for specific years  
390 (See Methods) and so we present the means over those years.

391 Relative to the mean percentage of inventory of all sheep and specifically for lamb losses over  
392 the 5 years where data were available (See Methods), California ranked 6<sup>th</sup> of the 12 states (Fig.  
393 7a & b). When considering the 6 years separately, the percentage lamb loss to pumas in  
394 California for each year was significantly lower than the corresponding mean for the other 11  
395 states (Paired  $t = 3.53$ ,  $P = 0.0077$ ). This was also the case for all sheep combined (Paired  $t =$   
396  $5.692$ ,  $P < 0.001$ ).

397 **Fig. 7. Ranking of each western state with puma (Texas included) relative to percent of**  
398 **total sheep (a) and total lambs (b) killed by pumas.** Percentage of animals lost per state were  
399 means of the 5 years data were available (1990, 1994, 1999, 2004, & 2014).

400 As with cattle, we combined the total sheep loss data from the 10 states with a sport hunt for the  
401 5 years and correlated them with puma kill density for the years previous to the sample years.  
402 Again, there was no significant correlation. When we added the California data to the graph, but  
403 not the correlation, California again had some of the lowest percentage loss of sheep per number  
404 of puma killed. When we repeated this analysis for just lambs lost, again, no correlation was  
405 found.

406 Three states, Wyoming, Colorado and Utah, maintained cause specific losses of sheep and lambs  
407 to pumas for multiple years and we correlated sheep and lamb losses for those years with the  
408 level of puma killed for the years before. None of the correlations for Wyoming and Colorado  
409 were significant. For Utah there was a significant ( $P = 0.05$ ) positive relationship between the  
410 number of pumas killed the year before and the percentage of lambs lost and the correlation  
411 explained 16% of the variation seen. When all sheep losses were correlated with puma mortality  
412 levels, again the relationship was positive, significant ( $P = 0.049$ ) and explained 16% of the  
413 variation seen.

414 The results of the comparisons of livestock losses from pumas did not support the hypothesis that  
415 sport killing of pumas resulted in lower per-capita losses of cattle or sheep. In point of fact, in a  
416 few cases, the exact opposite of what was predicted was found: higher mortality rates of pumas  
417 were correlated with higher losses of livestock.

418 **Prediction 4: California will have higher puma predation on**  
419 **ungulate populations, specifically deer**

420 Several metrics are available to test the prediction that killing of pumas via the sport hunt will  
421 enhance deer populations or hunting opportunities for hunters. Two useful metrics are estimated  
422 deer density and deer hunter kills. These records are maintained by state agencies and commonly  
423 used as indicators of population trends ([http://cpw.state.co.us/thingstodo/Pages/Statistics-  
424 Deer.aspx](http://cpw.state.co.us/thingstodo/Pages/Statistics-Deer.aspx), Accessed on February 28, 2018). We used both metrics in the following comparisons.  
425 As explained in the Methods, we primarily limited our analyses to two timeframes: 1991-2015  
426 and from 2000-2015.

427 We initially compared long term pattern of changes in deer kill densities from 1927 to 1972  
428 between California and the average for 3 states that also had these data sets (Arizona, Oregon,  
429 and Utah). We sought to determine if California had any inherent differences in changes in deer  
430 abundance before the sport hunt of pumas was initiated relative to other states, which might  
431 affect any comparisons over later timeframes. We standardized the data by calculating the  
432 percentage each year's estimate was of the year with the maximum estimate recorded, which  
433 would equal 100%. This allowed us to more directly compare patterns of change in deer kill  
434 densities.

435 When we compared the percent of the maximum deer killed for each year for California and the  
436 three-state average for the other states, we found a relatively high degree of concordance (Fig.  
437 8b). Based on kill records, all deer populations experienced exponential style growth in the 40's  
438 and 50's, peaking around 1960. After 1960, deer populations of California and the other three  
439 states appeared to decline in a similar pattern. When compared with a simple correlation of the  
440 transformed percentages, the correlation was highly significant (Fig. 8b;  $F = 95.4$ ,  $P < 0.001$ ,  $R^2$   
441  $= 0.68$ ). Thus, as indicated by annual kill levels by hunters, changes in California's deer  
442 population before the beginning of the sport hunt of pumas appear comparable to other western  
443 states. At times, the magnitude of changes was different but the pattern of change matched.  
444 Consequently, any difference between California and the other states during the period of the  
445 sport hunt in those states could then be more likely because of the management differences.

446 **Fig. 8. (a) Number of deer killed by hunters each year (1927-1972) expressed as a**  
447 **percentage of the year with the highest deer kill level for California and the average for**  
448 **Arizona, Oregon, and Utah.** Figure 8b is the correlation of the mean percent of maximums for  
449 the three states versus percent maximum for California.

450 To test for those differences in these later time periods, we compared California to the 10-state  
451 average from 2000-2015 (Fig. 9a). Many states did not have kill data back to 1990 and so we  
452 limited our comparison just to the later timeframe of most intense puma kill rates. The prediction  
453 tested was that California should exhibit different patterns of change than the other states. For  
454 these comparisons, we also converted the number of deer killed in each year to percentages of  
455 the year of maximum annual deer kill within that timeframe, to make the lines more comparable.  
456 We found (Fig. 9a) again that the patterns of change in deer kill density for California matched  
457 closely the pattern of the average for the 10 states. Of note is that California and most of the

458 other states experienced increased deer kills within the last 4 years, supporting the reported  
459 estimates of increasing populations of deer in most western states [33, 34]. We found that these  
460 data were also significantly correlated ( $F = 19.1$ ,  $P < 0.001$ ,  $R^2 = 0.55$ , Fig. 9b).

461 **Fig. 9. (a) Number of deer killed by hunters each year (2000-2015) expressed as a**  
462 **percentage of the year with the highest deer kill level for California and the mean for the**  
463 **ten states with a sport hunt of pumas.** Figure 9b is the correlation of the mean percent of  
464 maximums for the 10 states versus percent maximum for California.

465 As deer populations in all states seem to be undergoing similar trends, we then tested the  
466 following predictions regarding comparisons between California and the other 10 western states.

467 **Prediction: After 15 years of intensive puma control, states with sport hunting**  
468 **of pumas should experience higher deer densities and deer kill densities of**  
469 **deer by hunters than California.**

470 We compared California and the 10 states to determine whether or not either deer densities or  
471 kill densities changed from the onset of higher puma kill rates over most states in 2000 to 2015.  
472 We found that most states had lower deer and deer kill densities (Fig. 10). Of the states that had  
473 positive changes in deer and deer kill densities, California ranked 2<sup>nd</sup> and 3<sup>rd</sup> highest respectively  
474 (Fig. 12a & b). For most states, deer densities and kill densities have been gradually declining in  
475 spite of record high kill rates of pumas. These results do not support the prediction that the  
476 intensive killing of pumas through the sport hunt has led to increased deer numbers over the last  
477 15 years.

478 **Fig. 10. (a) Difference in deer density (#/km<sup>2</sup>) from 2000 to 2015 for California and 7 of the**  
479 **10 states with a sport hunt on pumas where data were available.** Figure 10b difference in kill  
480 density (#/100 km<sup>2</sup>) from 2000 to 2015 for California and 9 of the 10 states with a sport hunt on  
481 pumas. There were insufficient data from Arizona for this analysis. States are identified by their  
482 standard two letter postal codes.

483 The primary prediction regarding deer is that the higher levels of killing of pumas should result  
484 in higher deer densities. We compared average deer densities among the 11 states for 1990-2015  
485 and 2000-2015 (Fig 11a) and 2016 (Fig 11b). Among the 11 states, California had the second  
486 highest deer densities in all three time periods.

487 **Fig. 11 (a) Ranking of mean deer densities (deer/km<sup>2</sup>) from 1991-2016 and 2000-2016 for**  
488 **California and the 10 states with a sport hunt on pumas.** Figure 11b is the mean deer  
489 densities in 2016 for California and the 10 states with a sport hunt on pumas. States are identified  
490 by their standard two letter postal code.

491 We further correlated both deer density and deer kill density with puma kill densities for the  
492 previous year for the 11 states (Table 1). The prediction was that increasing numbers of pumas  
493 killed should have a positive effect on deer density and the number of deer that hunters killed. In  
494 all cases except one (Washington), deer density and deer kill density either did not significantly  
495 correlate with puma kill densities or were negatively related, i.e. higher number of pumas killed  
496 resulted in lower deer densities and kill densities (Table 1).

497 **Table 1: Correlations of deer density estimates and the number of pumas killed the**  
498 **previous year.** Data are for the 11 western states (1a) and the deer numbers killed by hunters  
499 (deer kill density) and number of pumas killed the previous year (1b). Data are from 1990 to  
500 2015.

501 (a)

|     |                  | AZ           | CA   | CO     | ID   | MT     | NV   | NM           | OR     | UT   | WA           | WY     |
|-----|------------------|--------------|------|--------|------|--------|------|--------------|--------|------|--------------|--------|
| 502 |                  |              |      |        |      |        |      |              |        |      |              |        |
| 503 | F                | <sup>1</sup> | 1.79 | 16.0   | 2.35 | 38.4   | 1.65 | <sup>1</sup> | 5.28   | 3.60 | <sup>1</sup> | 16.4   |
| 504 | P                |              | 0.19 | 0.002  | 0.15 | <0.001 | 0.21 |              | 0.03   | 0.07 |              | <0.001 |
| 505 | R <sup>2</sup>   |              |      | 0.54   |      | 0.78   |      |              | 0.15   |      |              | 0.39   |
| 506 | <sup>2</sup> Rel |              | NS   | Neg    | NS   | Neg    | NS   |              | Neg    | NS   |              | Neg    |
| 507 | (b)              |              |      |        |      |        |      |              |        |      |              |        |
| 508 | F                | 12.8         | 1.14 | 37.6   | 0.29 | 38.3   | 0.59 | 0.8          | 40.9   | 0.43 | 8.9          | 0.29   |
| 509 | P                | 0.002        | 0.29 | <0.001 | 0.59 | <0.001 | 0.45 | 0.38         | <0.001 | 0.52 | 0.008        | 0.59   |
| 510 | R <sup>2</sup>   | 0.34         |      | 0.72   |      | 0.79   |      |              | 0.63   |      | 0.31         |        |
| 511 | <sup>2</sup> Rel | Neg          | NS   | Neg    | NS   | Neg    | NS   | NS           | Neg    | NS   | Pos          | NS     |

512 <sup>1</sup>Insufficient data to do the analysis

513 <sup>2</sup>Whether relationship was positive (Pos), negative (Neg) or not significant (NS)

514 **Prediction: There should be a positive correlation between deer hunter**

515 **success and the sport killing of pumas the previous year.**

516 Hunter success is a common metric used by game agencies to judge the success of providing  
517 deer hunting opportunities to hunters. Hunter success, which can differ widely over large  
518 geographic areas such as states, is influenced by various factor. These factors, which include but  
519 are not limited to deer density, season length and type (e.g. bucks only or either sex), weather,  
520 and how hunter success is calculated (e.g. total deer licenses sold versus “active” hunters in the  
521 field (Wyoming data)), make useful across state comparisons unrealistic. A further complication  
522 is that game agencies calculate how many deer are killed in different ways, e.g. mandatory  
523 check-ins vs surveys. To analyze trends within states, we compared these data separately within  
524 the 11 states. As with deer densities, we found no correlation or in the cases of Oregon (F = 15.5,  
525 P < 0.001, R<sup>2</sup> = 0.41) and Wyoming (F = 16.9, P < 0.001, R<sup>2</sup> = 0.55), negative correlations, i.e.



526 higher kill levels of pumas were associated with lower hunter success. These results indicated  
527 that the level of puma mortality did not produce the desired effect of higher hunter success.  
528 To make comparisons between California and the other 10 states regarding the pattern of hunter  
529 success over the 1990-2015 timespan, we calculated the percentage each year's hunter success  
530 was to the year the maximum hunter success was recorded (See Methods). We then averaged the  
531 percentages for the 10 states and plotted the results with the data from California (Fig. 12). As  
532 can be seen in Fig. 12, though the amplitude of the percent maximum for each year was different  
533 at times, the patterns of increases and decreases in hunter success appeared quite similar. Most  
534 years when hunter success went up in the ten states, it also did in California and vis versa. This  
535 indicates an underlying common factor other than puma predation could be driving hunter  
536 success.

537 **Fig. 12. Annual percent hunter success expressed as a percentage of the year of the highest**  
538 **hunter percent success for California and the 10 states with a sport hunt on pumas.** The  
539 curve for the 10 states is the mean of these states' values.

540 Another metric we used to ascertain if the killing of pumas by sport hunting was having a  
541 positive impact on deer availability for human hunters was the estimate of the number of deer per  
542 hunter available in the state. Recall that the prediction was that if sport hunting of pumas was  
543 having a positive effect, then we should see 1) a higher average number of deer per hunter in the  
544 10 hunting states compared to California over the 1990-2015 timeframe, 2) the 10 states with a  
545 sport hunt should have increases in deer per hunter estimates from 2000-to 2015 (there were  
546 insufficient data from several states for the 1990-2015 comparison), and 3) the kill level of  
547 pumas within a state should have a positive correlation with the number of deer per hunter.

548 In the first comparison, 5 hunting states had more and 5 had fewer deer per hunter than  
549 California (Fig. 13a). A one sample t-test comparing the 10 sport hunting states with California  
550 indicated no statistical difference. In the second comparison, after 15 years of puma mortalities,  
551 6 states, including California reported a decline in deer per hunter, with California having the  
552 smallest decrease, whereas two states (Utah and Oregon) reported more deer per hunter (Fig.  
553 13b). In the third comparison, correlating the number of deer per hunter for a given year with the  
554 density of puma kills the year before yielded two significant correlations, Oregon had a positive  
555 correlation ( $F = 31.5$ ,  $P < 0.001$ ,  $R^2 = 0.59$ ) and Wyoming had a negative one ( $F = 8.8$ ,  $P =$   
556  $0.014$ ,  $R^2 = 0.42$ ). The remaining states, including California had no significant relationship  
557 between puma kill levels and the number of deer per hunter within their borders.

558 **Fig. 13. (a) Mean number of deer per hunter (number of deer/number of hunters) for**  
559 **California and the 10 states with a sport hunt on pumas.** Figure 13b is the change in the  
560 number of deer per hunter from 2000 to 2015 for California and 7 of the 10 states with a sport  
561 hunt on pumas. Data were not available for Arizona, New Mexico, and Washington to make this  
562 comparison. States are identified by their standard two letter postal codes.

## 563 **Discussion**

564 Sport hunting has been widely employed by state wildlife agencies in the western United States  
565 to manage puma since the early 1970's. Stated agency justifications for this practice are based on  
566 the hypotheses that widespread killing of puma by hunters will suppress puma numbers, thereby  
567 reducing undesirable puma impacts on human safety, livestock, and ungulate populations (e.g.  
568 <https://idfg.idaho.gov/wildlife/predator-management>, Accessed on February 28, 2018). This  
569 management strategy has been used by 10 westerns states since the early 1970's to kill

570 increasing numbers of puma. There has now been sufficient time to test whether sport hunting is  
571 having the desired effects relative to an un-hunted puma population, i.e. California. By making  
572 various comparisons between the 10 sport hunting states and California we tested the hypotheses  
573 that a sport hunt would: 1) suppress puma numbers at levels lower than would be expected  
574 without a sport hunt and subsequently, 2) reduce problematic puma-human interactions, 3)  
575 reduce puma depredation on domestic livestock, and 4) reduce the impact of puma predation in  
576 wild ungulate numbers.

577 Within the constraints of the robustness of the data available, we found no evidence those data  
578 support the hypothesis that sport hunting has long-term effects on puma numbers. California  
579 reports similar average densities of pumas as the 10 hunting states after 40+ years of increasing  
580 sport hunting rates by those states (Fig. 2). These results concur with those of [14] who found no  
581 evidence of sport hunting having a regulating impact on puma populations. In their study, a main  
582 factor possibly negating any controlling influence of hunting was the immigration of dispersing  
583 individuals from surrounding areas [35]. As any dispersing pumas from California would only  
584 have a limited regional impact, e.g. Arizona, Nevada and Oregon, it is unlikely that dispersing  
585 individuals from California are affecting puma abundance across the entire West.

586 Additionally, in Oregon the records indicate that increasing killing of pumas is associated with  
587 increases, not decreases, in estimated puma numbers (Fig 3). As reported by state the agency,  
588 both puma numbers and puma kill rates in Oregon have substantially risen over the last 20 years,  
589 contrary to what would be predicted by the sport hunting model. Consequently, based on their  
590 own data, this alone would argue against further use of sport hunting of pumas as a management  
591 tool.

592 Pumas are widely recognized by wildlife managers as one of the more difficult species to  
593 enumerate. Most state agencies admit their population estimates for pumas have low reliability;  
594 Idaho, does not attempt to estimate puma numbers. Nevertheless, such estimates are often used  
595 to justify management decisions to increase the number of puma killed through sport hunting.  
596 However, we found no evidence, within the sensitivity of the data collected to distinguish  
597 differences, that the sport hunt has had the desired effect of reducing puma abundance.

598 The data from California appears to support some of the original studies proposing that social  
599 organization of pumas is a limiting factor on total puma abundance [36]. However, in the  
600 absence of sport hunting, the number of pumas in California is probably regulated by a  
601 combination of social organization and prey abundance [25, 26]. Puma populations fluctuate  
602 with prey abundance [25] and when prey abundance is low, its availability probably limits the  
603 number of pumas an area can support regardless of social limitations. However, with higher prey  
604 levels and increasing puma numbers, social strife possibly sets the upper limit of puma densities  
605 in an area, apparently regardless of whether the population is hunted or not. Recent work on  
606 social organization in pumas [37] indicates even more complex social interactions than earlier  
607 thought. These interactions underscore the importance of a stable social structure that sport  
608 hunting appears to disrupt [38].

609 Regarding the prediction that sport hunting of puma should reduce risk to human safety, recent  
610 studies have indicated that the use of this management tool may have just the opposite effect [20,  
611 39]. The results of our multi-state analysis in general supports the more regional findings in that  
612 first, there appears to be no relationship between sport hunting of pumas and human  
613 safety/conflicts. For each timeframe since 1972 considered, California has similar total numbers  
614 of recorded puma attacks as some hunting states and the third lowest number of per capita

615 attacks (Fig. 4). In our calculation of per capita rates, we considered the total populations of each  
616 state. This was in part because of the difficulty in separating out urban and rural population  
617 numbers but also in recognition that in many of the states, pumas are widespread throughout the  
618 states and readily use suburban and exurban areas [40, 41]. This is especially the case for  
619 California where pumas are commonly reported near and in major housing developments [41,  
620 42, 43, 44]. Though Florida was not included in this analysis, it should be noted that Florida  
621 panthers are totally protected, living in one of the most densely human populated area of the U.S.  
622 and there have been no attacks on humans over the same time intervals considered [45].

623 Contrary to predictions, higher kill rates of puma coincided with higher numbers of incidents in  
624 two of the three states where data were available, Utah and Washington. Our results from  
625 Washington from 1992-2015, concur with a 5-year analysis (2005-2010) of that state [20] and a  
626 more recent analysis from British Columbia [39]. Indiscriminate killing of pumas appears to  
627 disrupt social structure and stability [37, 38], resulting in younger less experienced individuals  
628 having more conflicts with humans [20].

629 The risk of puma attacks on humans is normally extremely low (approximately 2/year across the  
630 15 states where pumas are found). This is in comparisons to normally expected higher risks from  
631 other wildlife species, e.g. 150-200 human fatalities per year in deer-car collisions [46]. As sport  
632 hunting of deer is not used to address these higher incidences, we found no justification for the  
633 rationale to use sport hunting pumas to address human safety concerns.

634 The western states we considered all have major extensively managed livestock operations where  
635 livestock, mainly cattle and sheep, are grazed on open pasture, often in the same habitats used by  
636 pumas. Pumas do prey on these livestock. However, as with human risks, the average rate of  
637 depredation is low, especially when considered as a percentage of the total number of head of

638 livestock exposed to the risk of puma predation. This being the case, however, it is still valid to  
639 ask: could the sport hunt of pumas further lower the predation rate on cattle and sheep? Based on  
640 our analysis of the data, the answer appears to be no. Comparing the 10 puma hunting states to  
641 California we found no difference in the percent loss of total inventory of cattle (Fig. 5) or sheep  
642 (Fig. 7). We also found no effect of puma kill rates among all the states and percentage of  
643 inventory lost (Fig 6). On the contrary, in concurrence with data from Washington (20) (Peebles  
644 et al. 2013), we did find higher percentages of calves killed by pumas with higher puma kill rates  
645 in Oregon (Fig. 6b) and a similar response for sheep and lambs in Utah. Peebles et al. [20]  
646 credited the higher rates of livestock predation in their study to the disruption of the social order  
647 by the indiscriminate killing of resident individuals by the sport hunt. It would appear that in  
648 these two states at least, a similar social upheaval might be occurring. In conclusion, again, our  
649 multi-state analysis failed to demonstrate any reduction of livestock depredation attributable to  
650 the sport hunt of pumas.

651 The last prediction we tested was whether the sport hunt of pumas resulted in “more game in the  
652 bag” for deer hunters. Much to the frustration of game agencies, rising and falling deer  
653 populations seems to be the norm for most of the western states [18, 47]. Over the long term, the  
654 general pattern based on available data has been a significant increase in deer numbers after deer  
655 were protected from uncontrolled hunting prior to the 1920’s (Fig. 8). It appears that in most  
656 states, including California, deer populations peaked around 1960 and then declined dramatically  
657 after, with a minor recovery in the mid 1980’s. There have been innumerable number of studies  
658 and several reviews of those studies to try and identify what is driving deer populations. The  
659 usual suspects have been considered extensively, e.g. weather, habitat destruction, over-  
660 browsing, and predation. Many studies have tested whether pumas are affecting deer populations

661 [17, 26, 48, 49] and at least three reviews of these studies exist [15, 16,18]. The general  
662 consensus is that pumas are not affecting deer numbers and killing puma only will enhance deer  
663 populations under very limited circumstances in space and time [15,16, 49]. Similar non-impacts  
664 by pumas have been found for elk [48, 50]. Yet, most agencies still use blanket killing of pumas  
665 by sport hunting over most of their state, an approach which appears unjustified. In one study  
666 [25, 49] puma population numbers were monitored through the increase in deer numbers in the  
667 mid 1980's and their subsequent decline. Based on the demographics of the puma population  
668 [25], it appeared that deer numbers were more likely driving puma numbers, with deer numbers  
669 being more affected by weather conditions [49]. Our multi-state analysis in general concurs with  
670 these many studies and reviews.

671 We first found that average annual deer densities in California were the second highest for all  
672 time intervals considered (Fig. 11). The differences in deer densities among states could be due  
673 to inherent limits in habitat carrying capacity. This is possibly the case for the states of Arizona,  
674 Nevada, and New Mexico as they encompass primarily desert environments. However, most  
675 other states did have some years that equaled or exceeded the average deer densities for  
676 California. This indicated that while they had the potential to have similar or higher densities, the  
677 sport killing of puma did not seem to lead to those higher densities. We found only one state,  
678 Washington, where deer densities were positively related to the number of puma killed (Table 1).  
679 In the other states, including California, there was either no relationship or it was a negative one,  
680 e.g. lower deer density with higher number of puma killed. Additionally, deer densities in most  
681 states, including Washington, have decreased in association with the higher levels of puma kill  
682 rates since the year 2000 (Fig. 10).

683 A major management goal of most agencies is to provide hunters with a reasonable level of  
684 success. That success can be measured, in part, by the number of deer per hunter. Regardless of  
685 the total deer density, the more deer per hunter, the more likely a hunter can be successful. This  
686 can be seen in New Mexico where, though it had the lowest deer density of all the states (0.4  
687 deer/km<sup>2</sup>), had the highest deer per hunter (6.2) and thus had a relatively high hunter success rate  
688 (42.2%). California had an equal to or higher number of deer per hunter as 7 of the sport hunting  
689 states, indicating that there were similar numbers of deer available to hunters in most states  
690 regardless of whether pumas were removed. Further, when we compared the change in deer per  
691 hunter data for each state after 15 years of intense killing of puma, most states had fewer deer per  
692 hunter, with California having the least decline.

693 The overall conclusion of these comparisons is a rejection of the sport hunting hypothesis  
694 regarding 1) suppression of puma numbers, 2) reduction of problematic puma-human encounters,  
695 3) reduction of puma predation on livestock depredation, and 4) reduction of the impact of puma  
696 predation on wild ungulate populations. The results of these comparisons concur with a growing  
697 number of regional studies that find no consistent evidence that sport hunting is functioning as an  
698 effective management tool. It may, in fact, be having the opposite results [14, 20, 39]. It is  
699 becoming evident that under the guidelines of adaptive management, in the absence of evidence  
700 of its efficacy, state agencies should refrain from prescribing sport hunting as a management  
701 tool.

702 Whether or not sport hunting of pumas should be continued as a hunting opportunity to hunters  
703 is, however, a decision that should be made through the democratic process and involve all the  
704 citizens within each state. As specified by the North American Model of Wildlife Conservation,  
705 hunting laws should be created through the public process and should follow the tenets of the



706 NAM that state 1) wildlife is held in the public trust, 2) wildlife use is allocated by law, 3)  
707 wildlife should be killed only for a legitimate purpose, and 4) science should be the basis of all  
708 decisions [8] (Organ et al. 2012). In making that decision, game agencies will have to justify to  
709 the public that maintaining a sport hunt on pumas to solely provide trophy hunting opportunities  
710 to a small percent ( $< 0.2\%$ ) of the public is a legitimate reason for killing pumas. They should  
711 not use the four proposed outcomes analyzed here as a justification for the continuation of sport  
712 hunting of puma. Their own management data just does not support it.

### 713 Acknowledgements

714 We thank Harley Shaw for providing insightful suggestions on this manuscript. We also  
715 acknowledge the immense effort of the hundreds of state and federal employees and members of  
716 conservation NGOs who collected and compiled the vast amount of data used in our analyses. It  
717 is through their efforts that such a large-scale analysis was possible.

718

719   References

- 720       1. Leopold A. A Sand County Almanac. New York: Oxford University Press; 1949.
- 721       2. Mech LD. A new era for carnivore conservation. *Wildlife Society Bulletin*. 1996; 24:
- 722       397-401.
- 723       3. Mattson DJ. Mountain lions in the west. In: Clark, SG and Rutherford MB, editors. *Large*
- 724       *Carnivore Conservation: Integrating Science and Policy in the North American West*.
- 725       Chap 2. University of Chicago Press; 2014. Pp. 29-62.
- 726       4. Cougar Management Guidelines Working Group. *Cougar Management Guidelines*. 1<sup>st</sup>
- 727       ed.; WildFutures Bainbridge Island, Washington; 2005.
- 728       5. Lambert CMS, Wielgus RB, Robinson HS, Katnik DD, Cruickshand HS, Clarke R,
- 729       Almack J. Cougar population dynamics and viability in the Pacific Northwest. *Journal of*
- 730       *Wildlife Management*. 2006;70: 246-254.
- 731       6. Treves A. Hunting for large carnivore conservation. *Journal of Applied Ecology*.
- 732       2009;46: 1350-1356.
- 733       7. Humane Society of the United States. 2017. *State of the mountain lion A call to end*
- 734       *trophy hunting of America’s lion*. The Human Society of the United States. Washington
- 735       DC; 2017.
- 736       8. Organ JF, Geist V, et al. *The North American Model of Wildlife Conservation*. Bethesda
- 737       MD: The Wildlife Society; 2012.
- 738       9. Peterson MN, Nelson, MP. Why the North American Model of Wildlife Conservation is
- 739       problematic for modern wildlife management. *Human Dimensions of Wildlife*. 2017: 22:
- 740       43-54. [doi.org/10.1080/10871209.2016.1234009](https://doi.org/10.1080/10871209.2016.1234009)

741

- 742 10. Vucetich JA, Bruskotter JT, Nelson MP, Peterson RO, Bump JK. Evaluating the  
743 principles of wildlife conservation: a case study of wolf (*Canis lupus*) hunting in  
744 Michigan, United States. *Journal of Mammalogy*. 2017;98: 53-64.
- 745 11. Feldpausch-Parker AM, Parker ID, Vidon ES. Privileging consumptive use: A critique of  
746 ideology, power, and discourse in the North American Model of Wildlife Conservation.  
747 *Conservation and Society*. 2017;15: 33-40.
- 748 12. Artelle KA, Reynolds JD, Treves A, Walsh JC, Paquet PC, Darimont CT. Hallmarks of  
749 science missing from North American wildlife management. *Sciences Advances*. 2018. 4:  
750 eaao0167. DOI: 10.1126/sciadv.aao0167,
- 751 13. Darimont CT, Paquet PC, Treves A, Artelle KA, Chapron G. Political populations of  
752 large carnivores. *Conservation Biology*. 2018. DOI: 10.1111/cobi.13065.
- 753 14. Cooley HS, Wielgus RB, Koehler GM, Robinson HS, Maletzke BT. Does hunting  
754 regulate cougar populations? A test of the compensatory mortality hypothesis. *Ecology*.  
755 2009;90: 2913-2921.
- 756 15. Connolly GE. Predators and predator control. In: Schmidt, JL, Gilbert D.L, editors. *Big*  
757 *Game of North America*. Harrisburg: Stackpole;1978. pp 369-394.
- 758 16. Ballard WB, Lutz D, Keegan TW, Carpenter LH, deVos, Jr. JC. Deer-predator  
759 relationships: A review of recent North American studies with emphasis on mule and  
760 black-tailed deer. *Wildlife Society Bulletin*. 2001;29: 99-115.
- 761 17. Hurley MA, Unsworth JW, Zager P, Hebbelwhite M, Gaton EO, Montgomery DM et al.  
762 Demographic response of mule deer to experimental reduction of coyotes and mountain  
763 lions in Southeastern Idaho. *Wildlife Monographs*. 2011;178: 1-33.

- 764 18. Forrester TD, Wittmer HU. A review of the population dynamics of mule deer and black-  
765 tailed deer *Odocoileus hemionus* in North America. Mammal Review. 2013;43: 292-308.
- 766 19. Treves A, Krofel M, McManus J. Predator control should not be a shot in the dark.  
767 Frontiers in ecology and Environment. 2016;14: 380-388.
- 768 20. Peebles KA, Wielgus RB, Maletzke BT, Swanson ME. Effects of remedial sport hunting  
769 on cougar complaints and livestock depredations PLoS ONE 2013 8(11): e79713.  
770 doi:10.1371/journal.pone.0079713
- 771 21. Laundré JW, Clark TW. Managing puma hunting in the western United States: through a  
772 metapopulation approach. Animal Conservation. 2003;6: 159-170.
- 773 22. Beausoleil RA, Koehler GM, Maletzke BT, Kertson BN, Wielgus RB. Research to  
774 regulation: Cougar social behavior as a guide for management. Wildlife Society Bulletin.  
775 2013; 37:680-688.
- 776 23. Mooney H, Zavaleta E. Ecosystems of California. Berkely: University of California  
777 Press; 2016.
- 778 24. Beier P. Cougar attacks on humans in the United States and Canada. Wildlife Society  
779 Bulletin. 1991;19: 403-412.
- 780 25. Laundré JW, Hernández L, Clark SG. Numerical and Demographic responses of pumas  
781 to changes in prey abundance: testing current predictions. Journal of Wildlife  
782 Management. 2007;71: 345-355.
- 783 26. Logan KA, Swenar LL. Desert Puma: Evolutionary Ecology and Conservation of an  
784 Enduring Carnivore. Washington DC: Island Press, 2001.
- 785 27. Texas Agricultural Statistics. Texas Agricultural Statistics 2009. Austin: Texas  
786 Department of Agriculture; 2009.

- 787 28. Zar JH. Biostatistical analysis. 4<sup>th</sup> Edition. New Jersey: Simon & Schuster, 1999.
- 788 29. Becker SA, Bjornlie DD, Lindzey FG, Moody DS. Eds. 2003. Proceedings of the Seventh  
789 Mountain Lion Workshop. Lander, Wyoming USA.
- 790 30. Kolbe J. Montana mountain lion status report. In: McLaughlin CR, Vieira M, editors.  
791 Proceedings of the 12<sup>th</sup> Mountain lion workshop. Estes Park, Colorado; 2017. pp 99-103.
- 792 31. Robinson HS, DeSimone RM. The Garnet Range Mountain Lion Study: Characteristics  
793 of a Hunted Population in West-central Montana. Final Report, Montana Department of  
794 Fish, Wildlife & Parks, Helena: Wildlife Bureau; 2011.
- 795 32. Winslow F. New Mexico mountain lion status report. In: Mclaughlin CR, Vieira M,  
796 editors. Proceedings of the 12<sup>th</sup> Mountain lion workshop. Estes Park, Colorado; 2017. pp  
797 117-126.
- 798 33. Western Association of Fish and Wildlife Agencies. 2013. 2013 Black-tailed and mule  
799 deer status update.  
800 [http://www.wafwa.org/committees\\_\\_\\_groups/mule\\_deer\\_working\\_group/publications/](http://www.wafwa.org/committees___groups/mule_deer_working_group/publications/)
- 801 34. Western Association of Fish and Wildlife Agencies. 2016. 2016 Black-tailed and mule  
802 deer status update.  
803 [http://www.wafwa.org/committees\\_\\_\\_groups/mule\\_deer\\_working\\_group/publications/](http://www.wafwa.org/committees___groups/mule_deer_working_group/publications/)
- 804 35. Robinson HS, Wielgus RB, Cooley HS, Cooley SW. Sink populations in carnivore  
805 management: cougar demography and immigration in a hunted population. Ecological  
806 Applications. 2008;18: 1028-1037.
- 807 36. Seidensticker JC IV, Hornoker MG, Wiles WV, Messick JP. Mountain lion social  
808 organization in the Idaho Primitive Area. Wildlife Monographs. 1973;35: 3-60.

- 809 37. Elbroch LM, Quigley H. Social interactions in a solitary carnivore. *Current Zoology*,  
810 2017; 63: 357-362 doi: 10.1093/cz/zow080.
- 811 38. Maletzke BT, Wielgus R, Koehler GM, Swanson M, Cooley H, Alldredge, JR. Effects of  
812 hunting on cougar spatial organization. *Ecology and Evolution*. 2014;4: 2178–85.
- 813 39. Teichman KJ, Cristescu B, Darimont CT. Hunting as a management tool? Cougar-human  
814 conflict is positively related to trophy hunting. *BMC Ecology*. 2016;16: 44. DOI  
815 10.1186/s12898-016-0098-4
- 816 40. Kertson BN, Spencer RD, Marzluff JM, Heinstall-Cymerman J, Grue CE. Cougar space  
817 use and movements in the wildland-urban landscape of western Washington. *Ecological  
818 Applications*. 2011; 21:2866-2881.
- 819 41. Benson JF, Sikich JA, Riley SPD. Individual and population level resource selection  
820 patterns of mountain lions preying on mule deer along an urban-wildland gradient. *PLoS  
821 ONE*. 2016; 11: e0158006. doi:10.1371/journal.pone.0158006
- 822 42. Beier P, Choate D, Barrett RH. Movement patterns of mountain lions during different  
823 behaviors. *Journal of Mammalogy*. 1995;76: 1056-1070.
- 824 43. Dickson BG, Jenness JS, Beier P. Influence of vegetation, topography and roads on  
825 cougar movement in southern California. *Journal of Wildlife Management*. 2005;69: 264-  
826 276.
- 827 44. Vickers TW, Sanchez JNM, Johnson CK, Morrison SA, Botta R, Smith T, et al. Survival  
828 and mortality of pumas (*Puma concolor*) in a fragmented, urbanizing landscape. *PLoS  
829 ONE*. 2015;10(7): [doi.org/10.1371/journal.pone.0131490](https://doi.org/10.1371/journal.pone.0131490).
- 830 45. Lotz M. Florida mountain lion status report. In: Mclaughlin, CR, Vieira, editors.  
831 Proceedings of the 12<sup>th</sup> Mountain lion workshop. Estes Park, Colorado; 2017. pp 85-92.

- 832 46. Gilbert SL, Sivy KJ, Pozzanghera CB, DuBout A, Overduijn K, Smith MM, et al.  
833 Socioeconomic benefits of large carnivore recolonization through reduced wildlife-  
834 vehicle collisions. *Conservation Letters*. 2017; 1-9, [doi.org/10.1111/conl.12280](https://doi.org/10.1111/conl.12280)
- 835 47. Unsworth JW, Pac DF, White GC, Bartmann RM. Mule deer survival in Colorado, Idaho,  
836 and Montana. *Journal of Wildlife Management*. 1999;63: 315-326.
- 837 48. Hornocker MG. An analysis of mountain lion predation upon mule deer and elk in the  
838 Idaho Primitive area. *Wildlife Monographs*. 1970;21: 3-39.
- 839 49. Laundré, JW, Hernández L, Clark SG. Impact of puma predation on the decline and  
840 recovery of a mule deer population in southeastern Idaho. *Canadian Journal of Zoology*.  
841 2006;84: 1555-1565.
- 842 50. White CG, P. Zager P, Gratson MW. Influence of predator harvest, biological factors,  
843 and landscape on elk calf survival in Idaho. *Journal of Wildlife Management*. 2010;74:  
844 355-369.

## 845 **Supporting information**

846 **S1 Fig. Correlation of number of puma-human incidences reported with puma removal**  
847 **density (#/10,000 km<sup>2</sup>).** Data are for California and the three states (Oregon, Washington, and  
848 Utah) for which these data were available.

849

bioRxiv preprint doi: <https://doi.org/10.1101/813311>; this version posted October 21, 2019. The copyright holder for this preprint (which was not certified by peer review) is the author/funder, who has granted bioRxiv a license to display the preprint in perpetuity. It is made available under aCC-BY 4.0 International license.

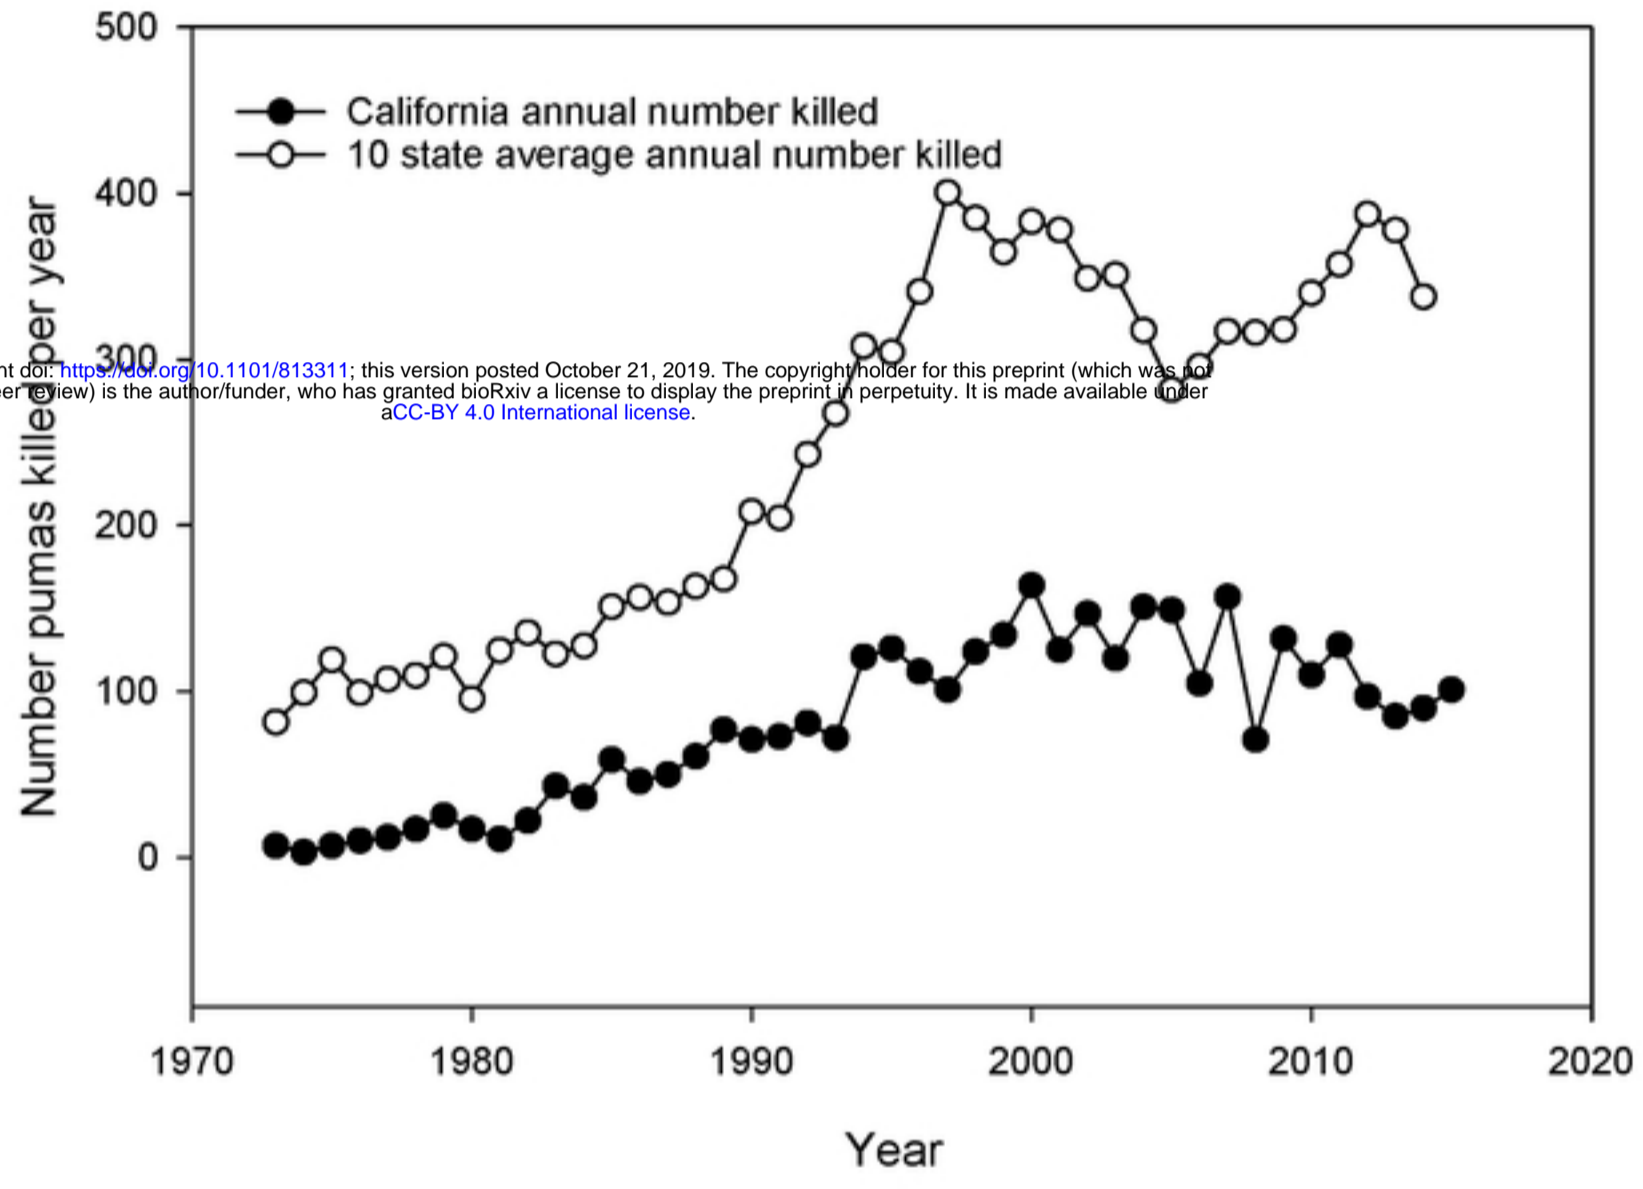

Figure 1



bioRxiv preprint doi: <https://doi.org/10.1101/813311>; this version posted October 21, 2019. The copyright holder for this preprint (which was not certified by peer review) is the author/funder, who has granted bioRxiv a license to display the preprint in perpetuity. It is made available under aCC-BY 4.0 International license.

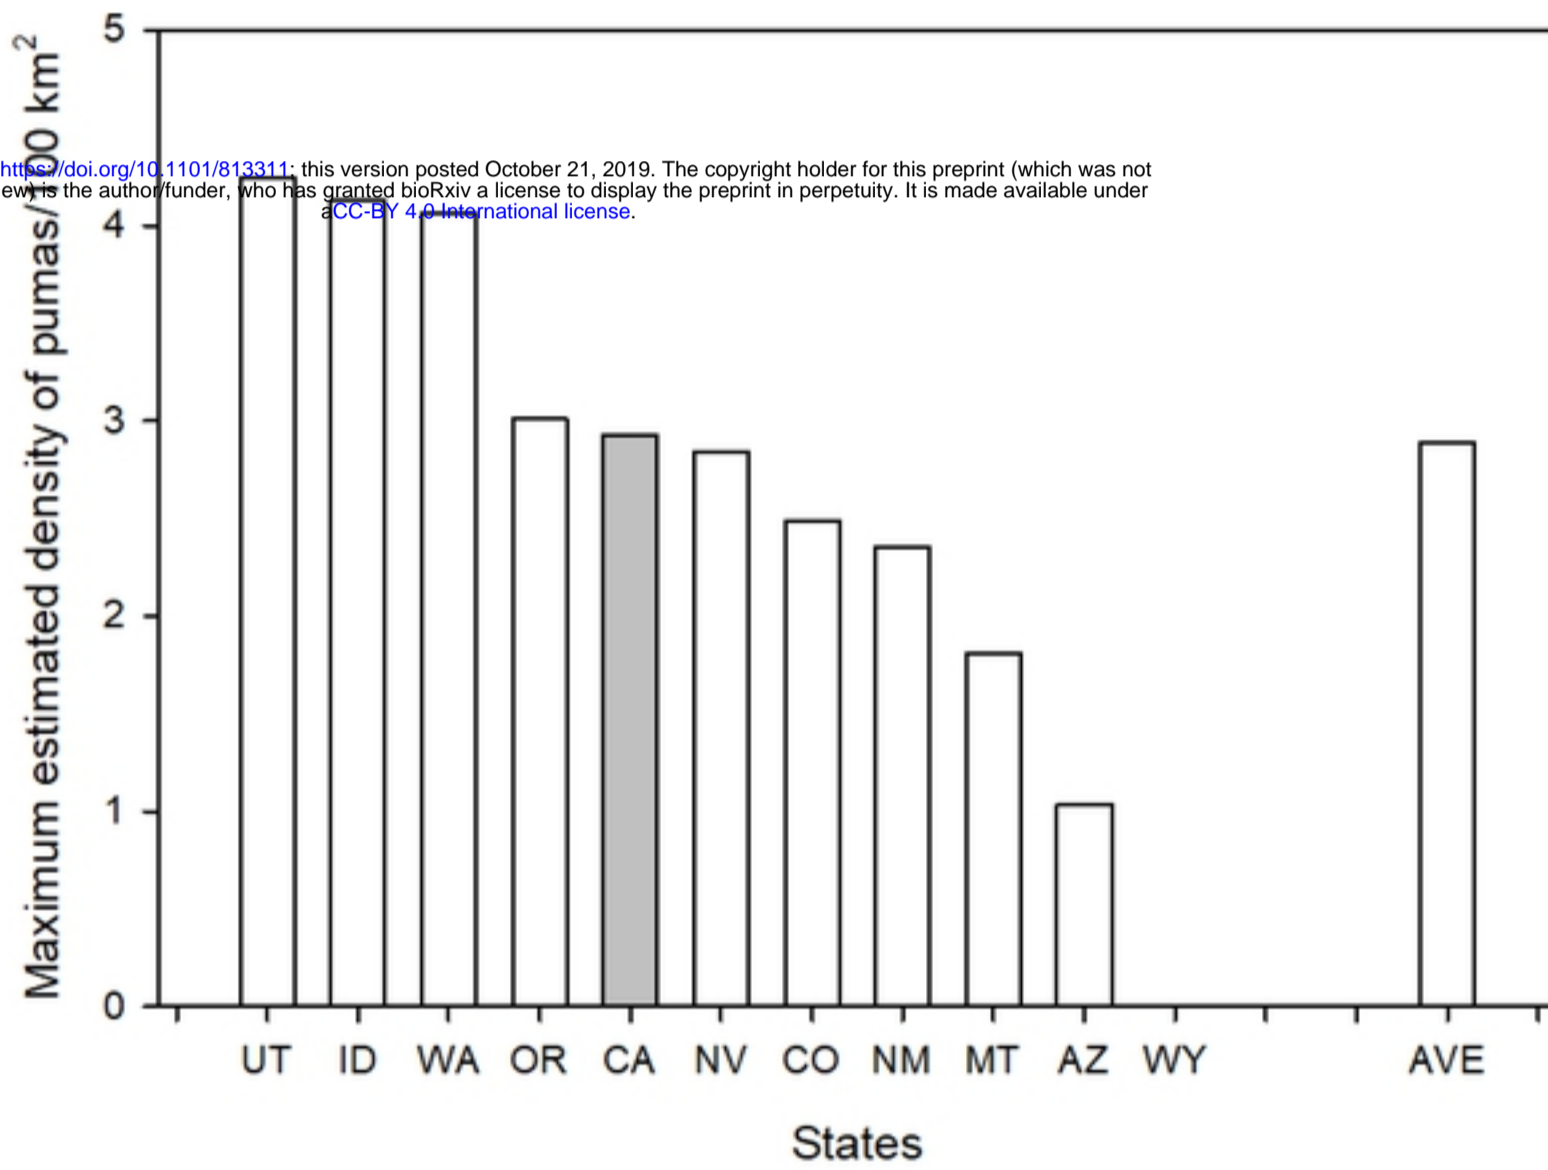

Figure 2

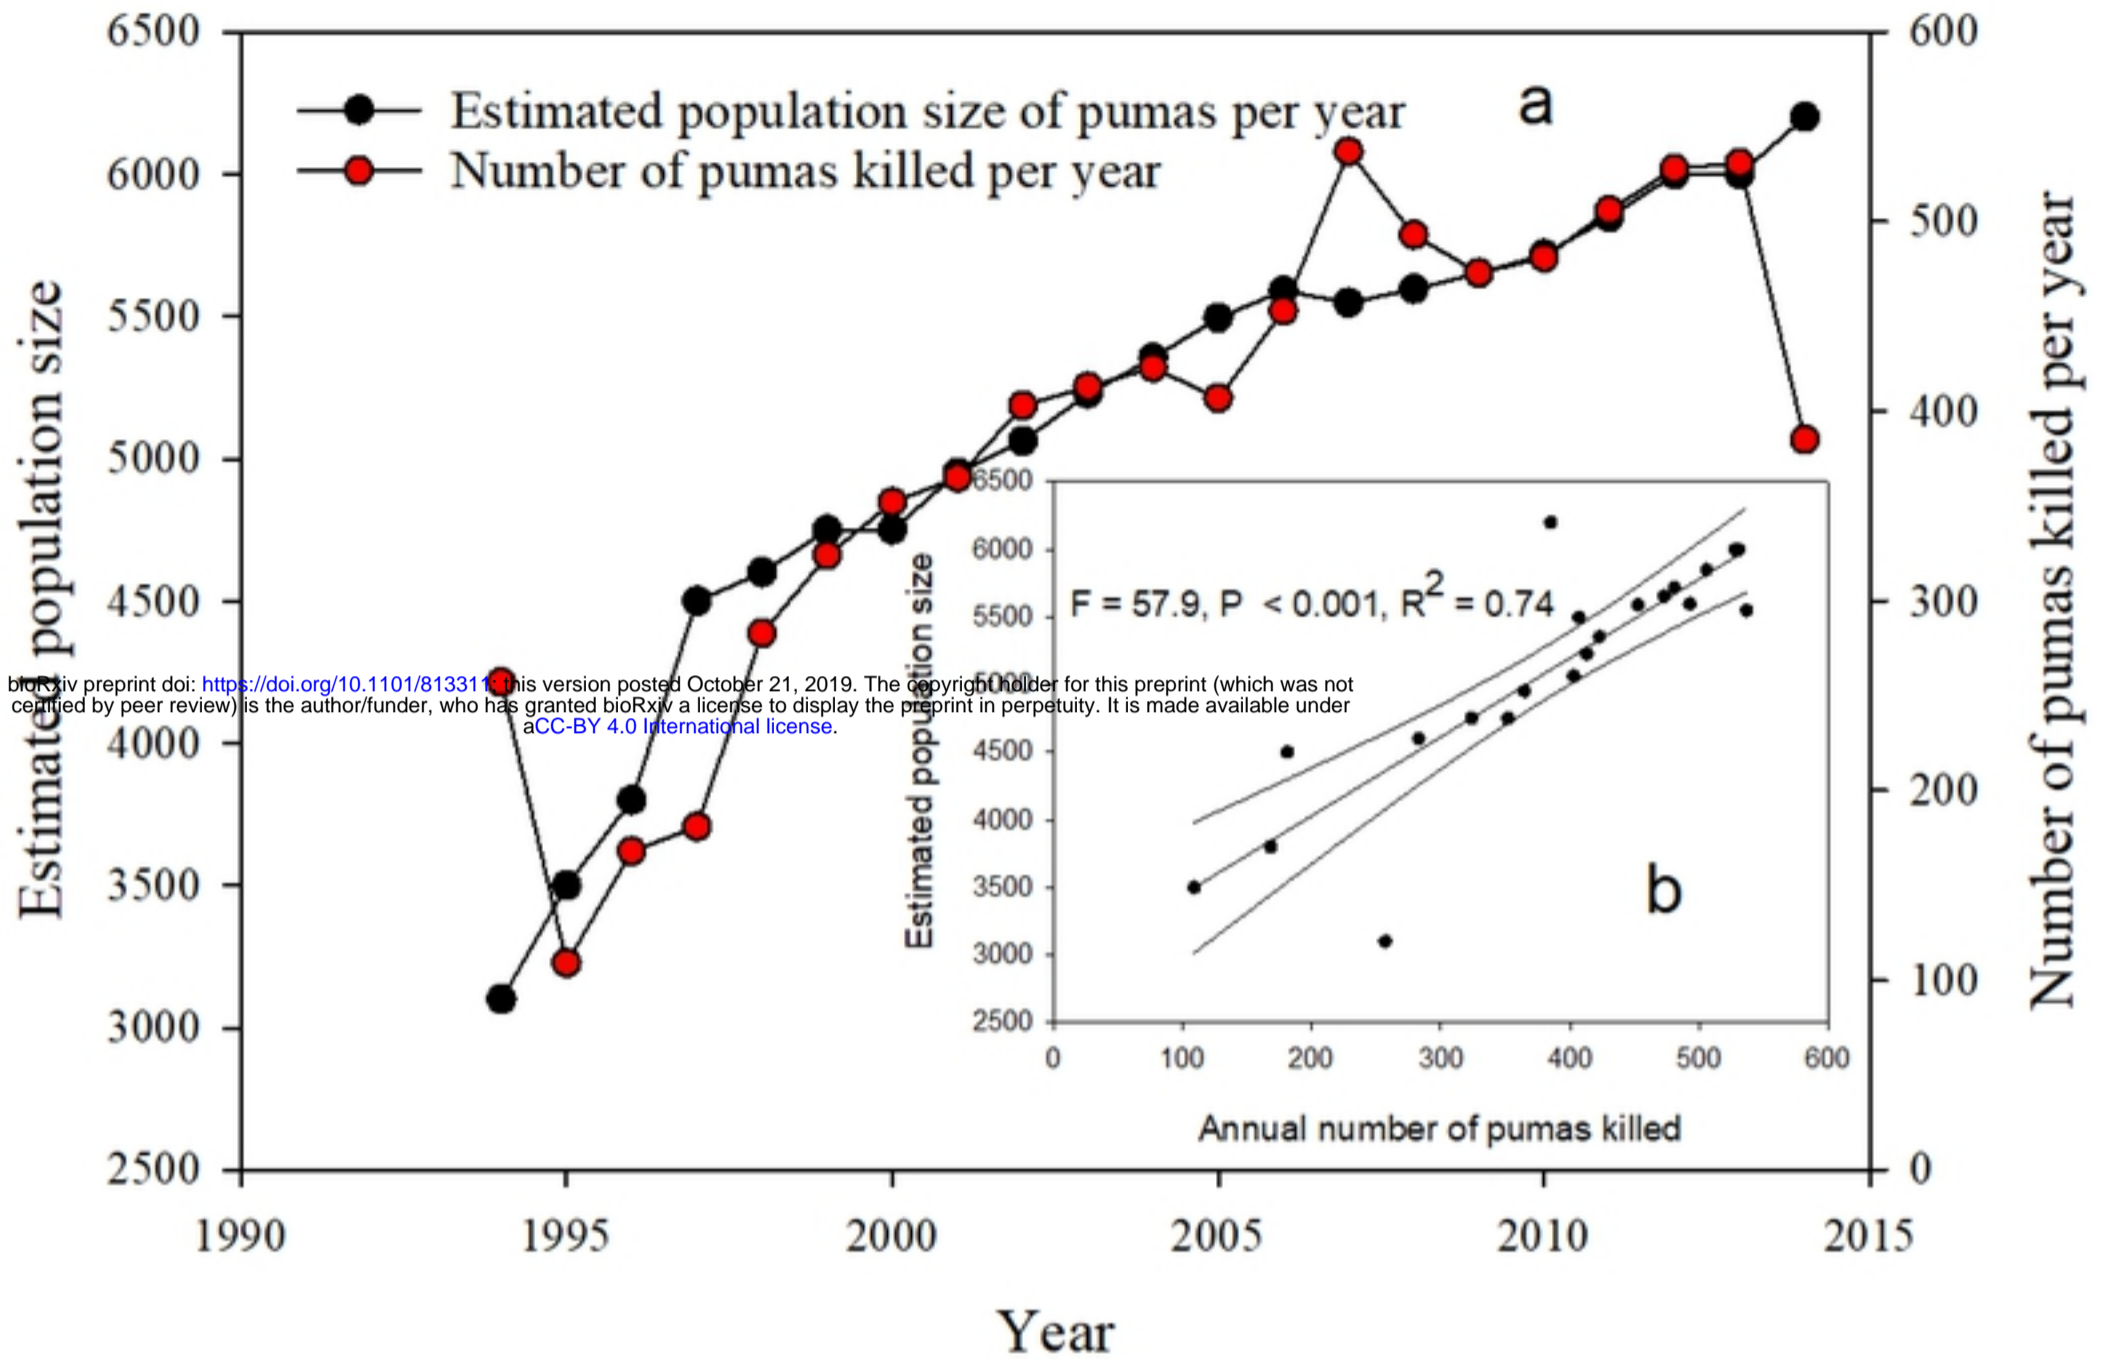

bioRxiv preprint doi: <https://doi.org/10.1101/813311>; this version posted October 21, 2019. The copyright holder for this preprint (which was not certified by peer review) is the author/funder, who has granted bioRxiv a license to display the preprint in perpetuity. It is made available under aCC-BY 4.0 International license.

Figure 3

bioRxiv preprint doi: <https://doi.org/10.1101/813311>; this version posted October 21, 2019. The copyright holder for this preprint (which was not certified by peer review) is the author/funder, who has granted bioRxiv a license to display the preprint in perpetuity. It is made available under aCC-BY 4.0 International license.

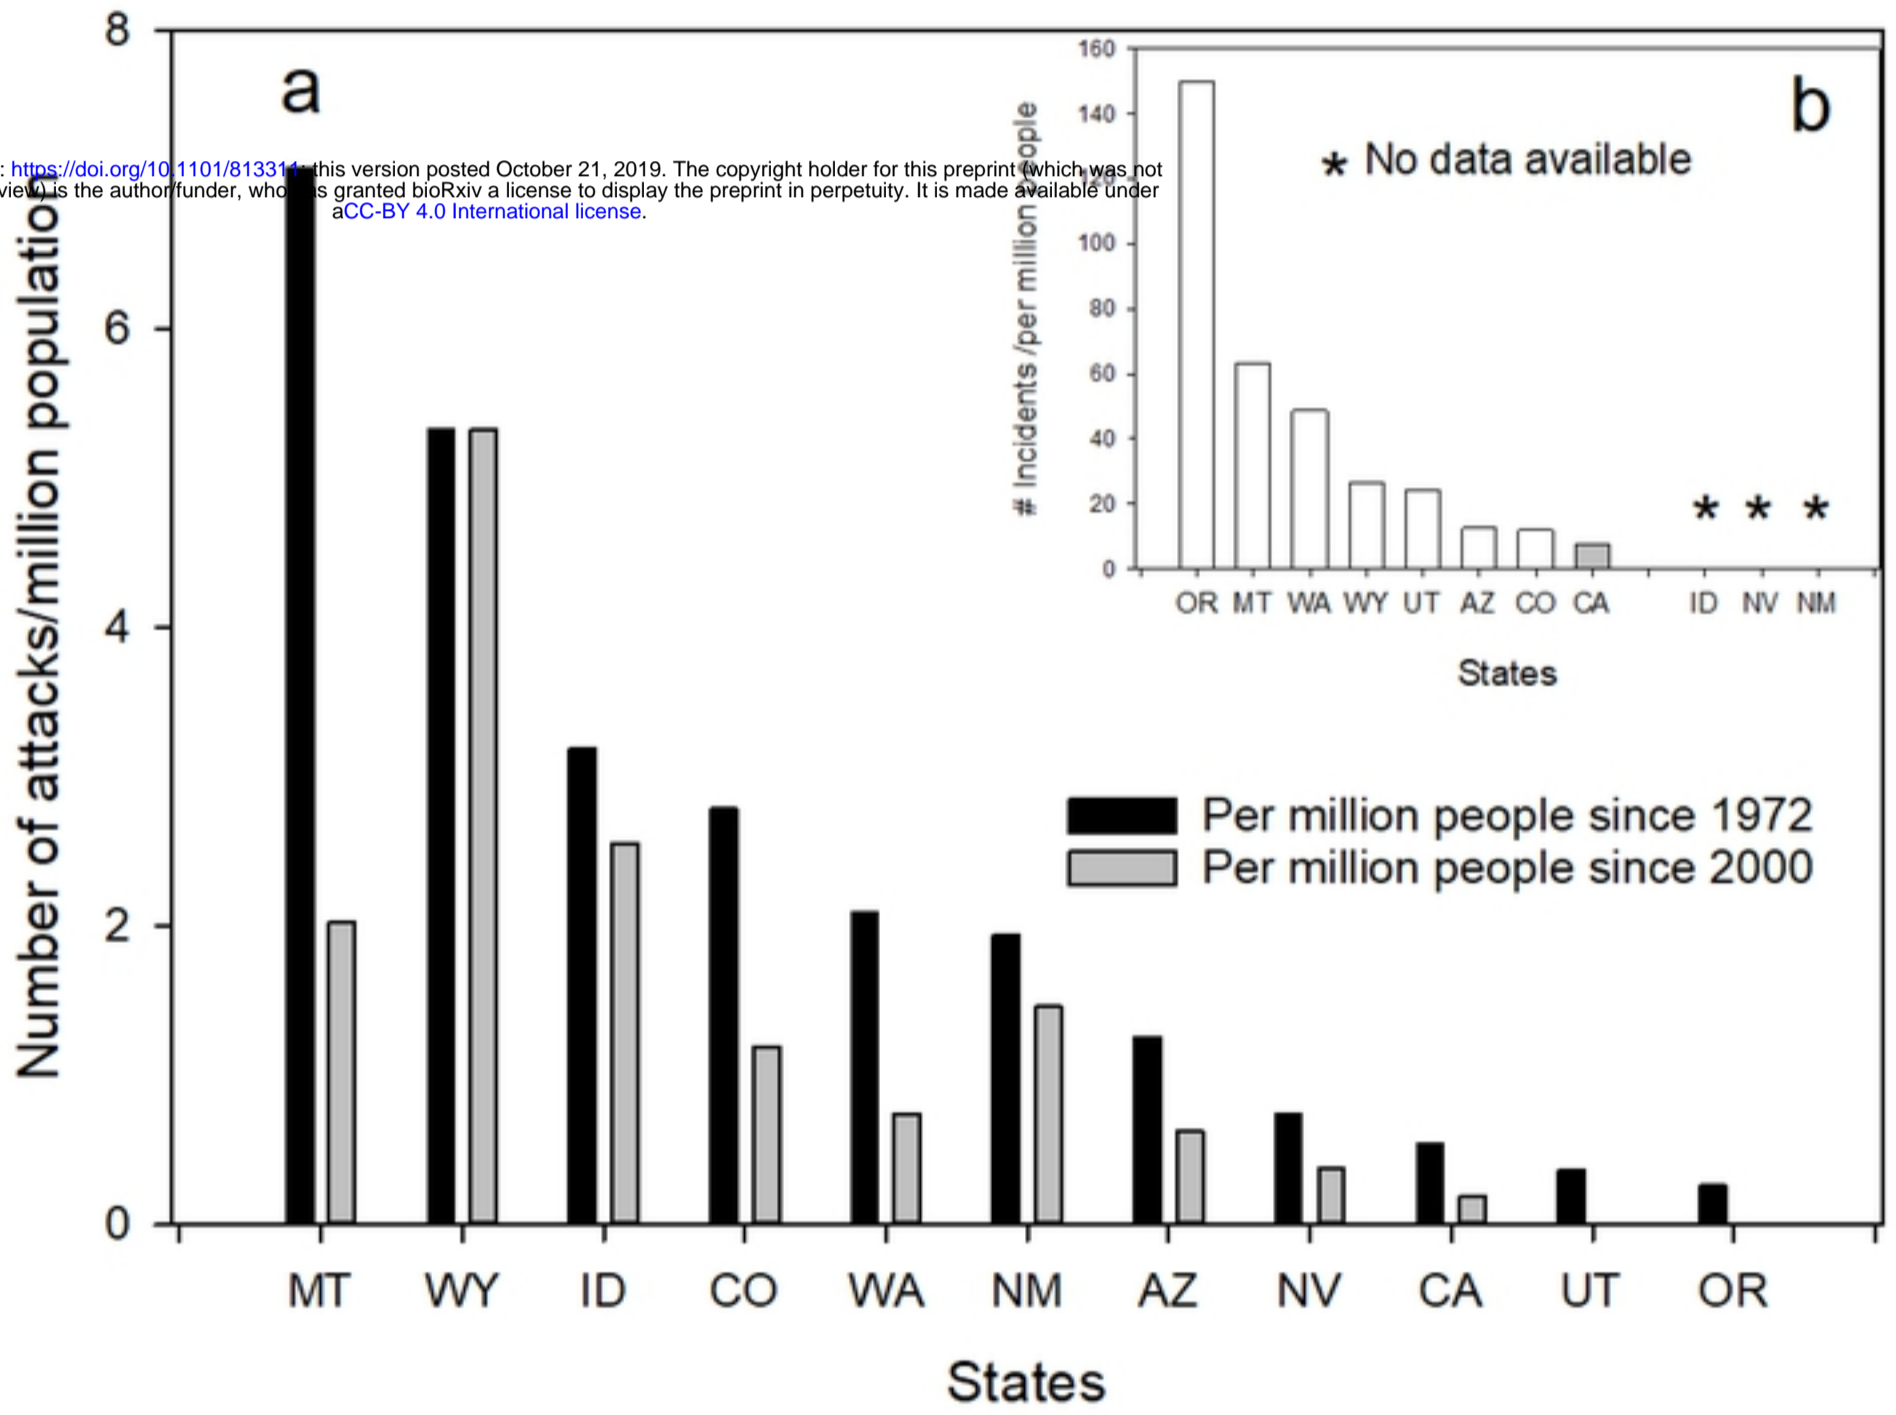

Figure 4

bioRxiv preprint doi: <https://doi.org/10.1101/813311>; this version posted October 21, 2019. The copyright holder for this preprint (which was not certified by peer review) is the author/funder, who has granted bioRxiv a license to display the preprint in perpetuity. It is made available under aCC-BY 4.0 International license.

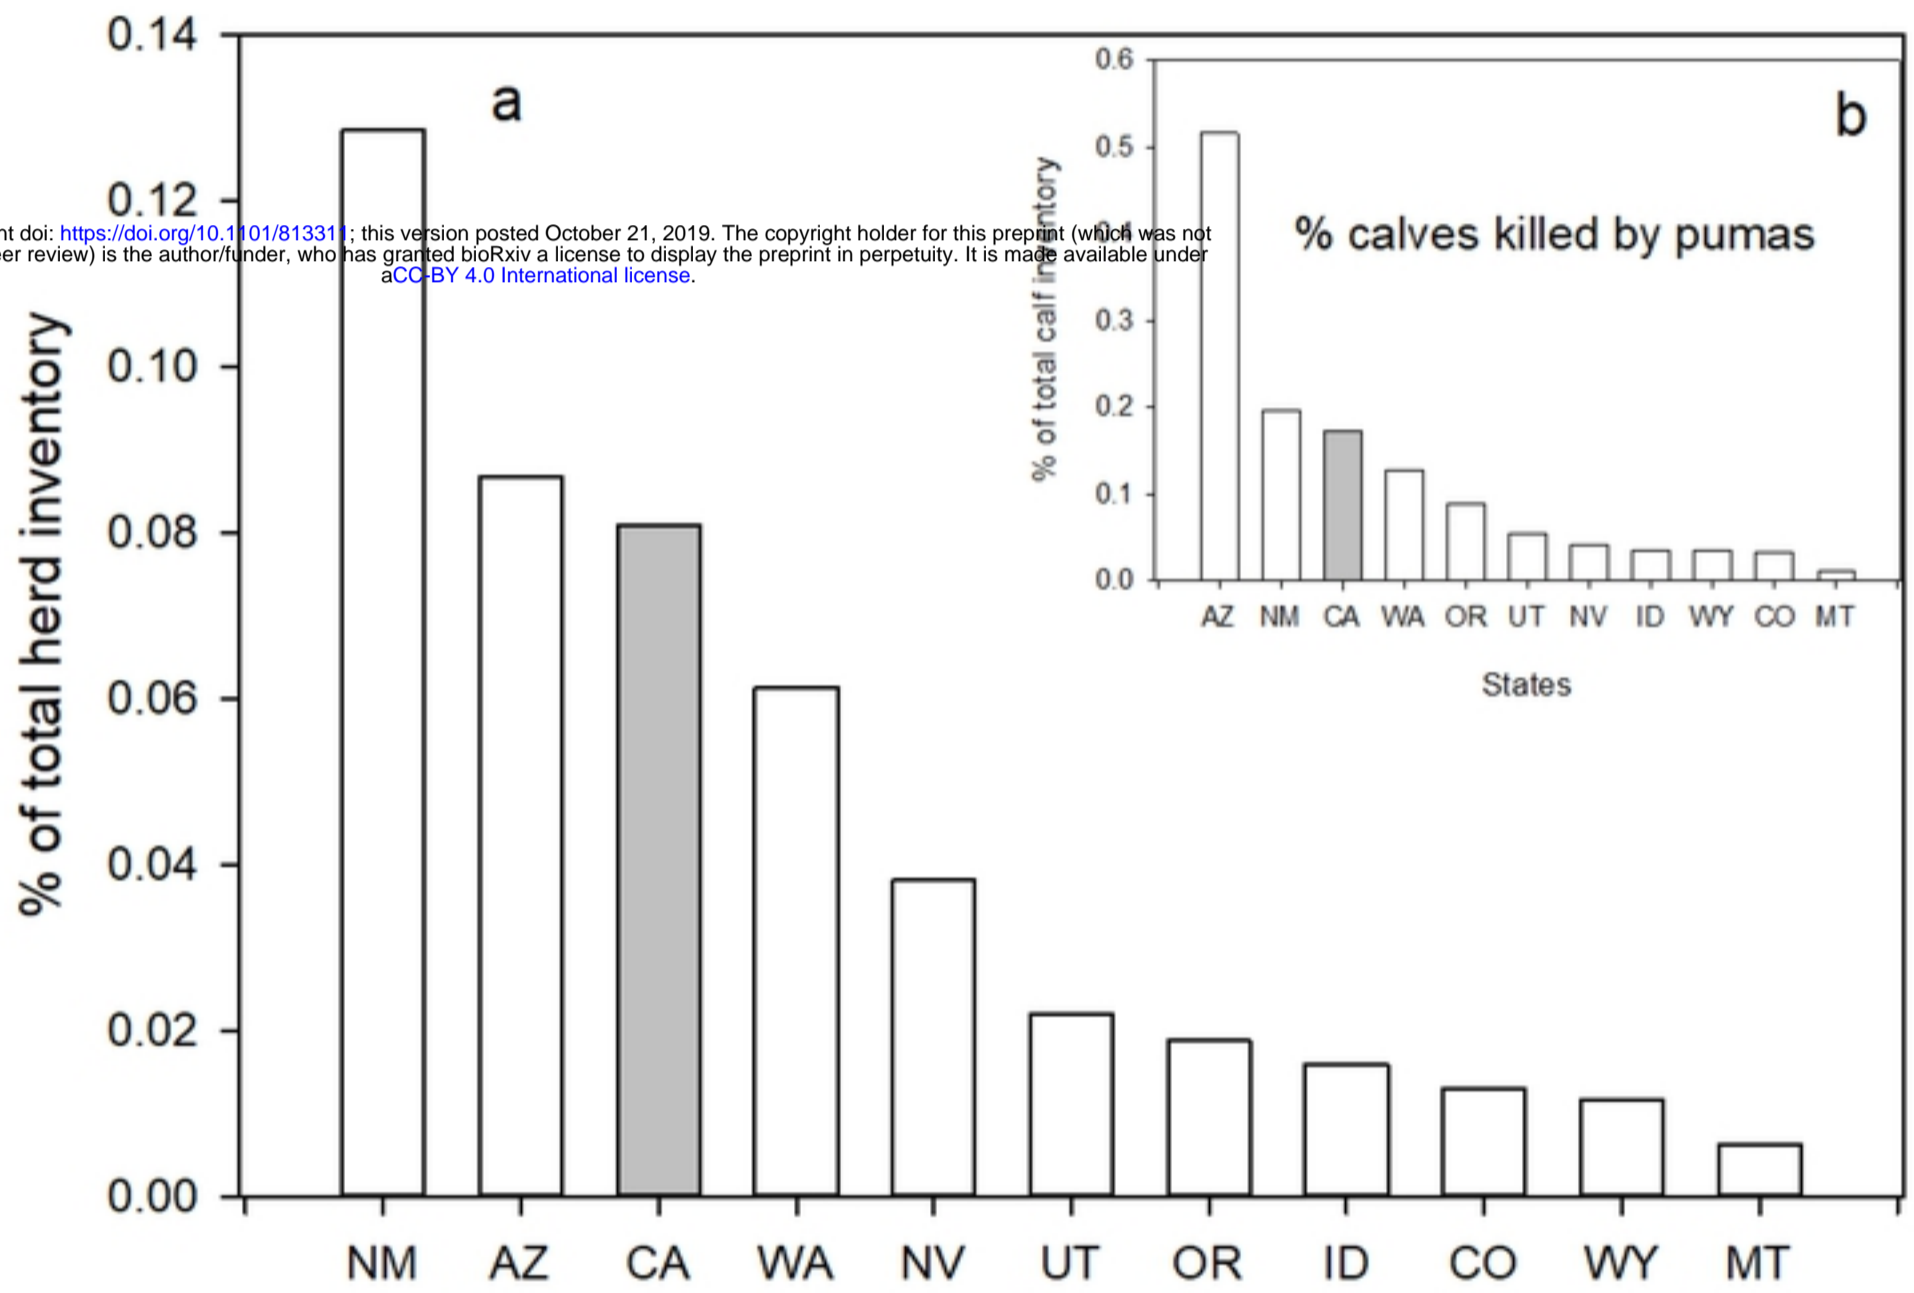

Figure 5

bioRxiv preprint doi: <https://doi.org/10.1101/813311>; this version posted October 21, 2019. The copyright holder for this preprint (which was not certified by peer review) is the author/funder, who has granted bioRxiv a license to display the preprint in perpetuity. It is made available under aCC-BY 4.0 International license.

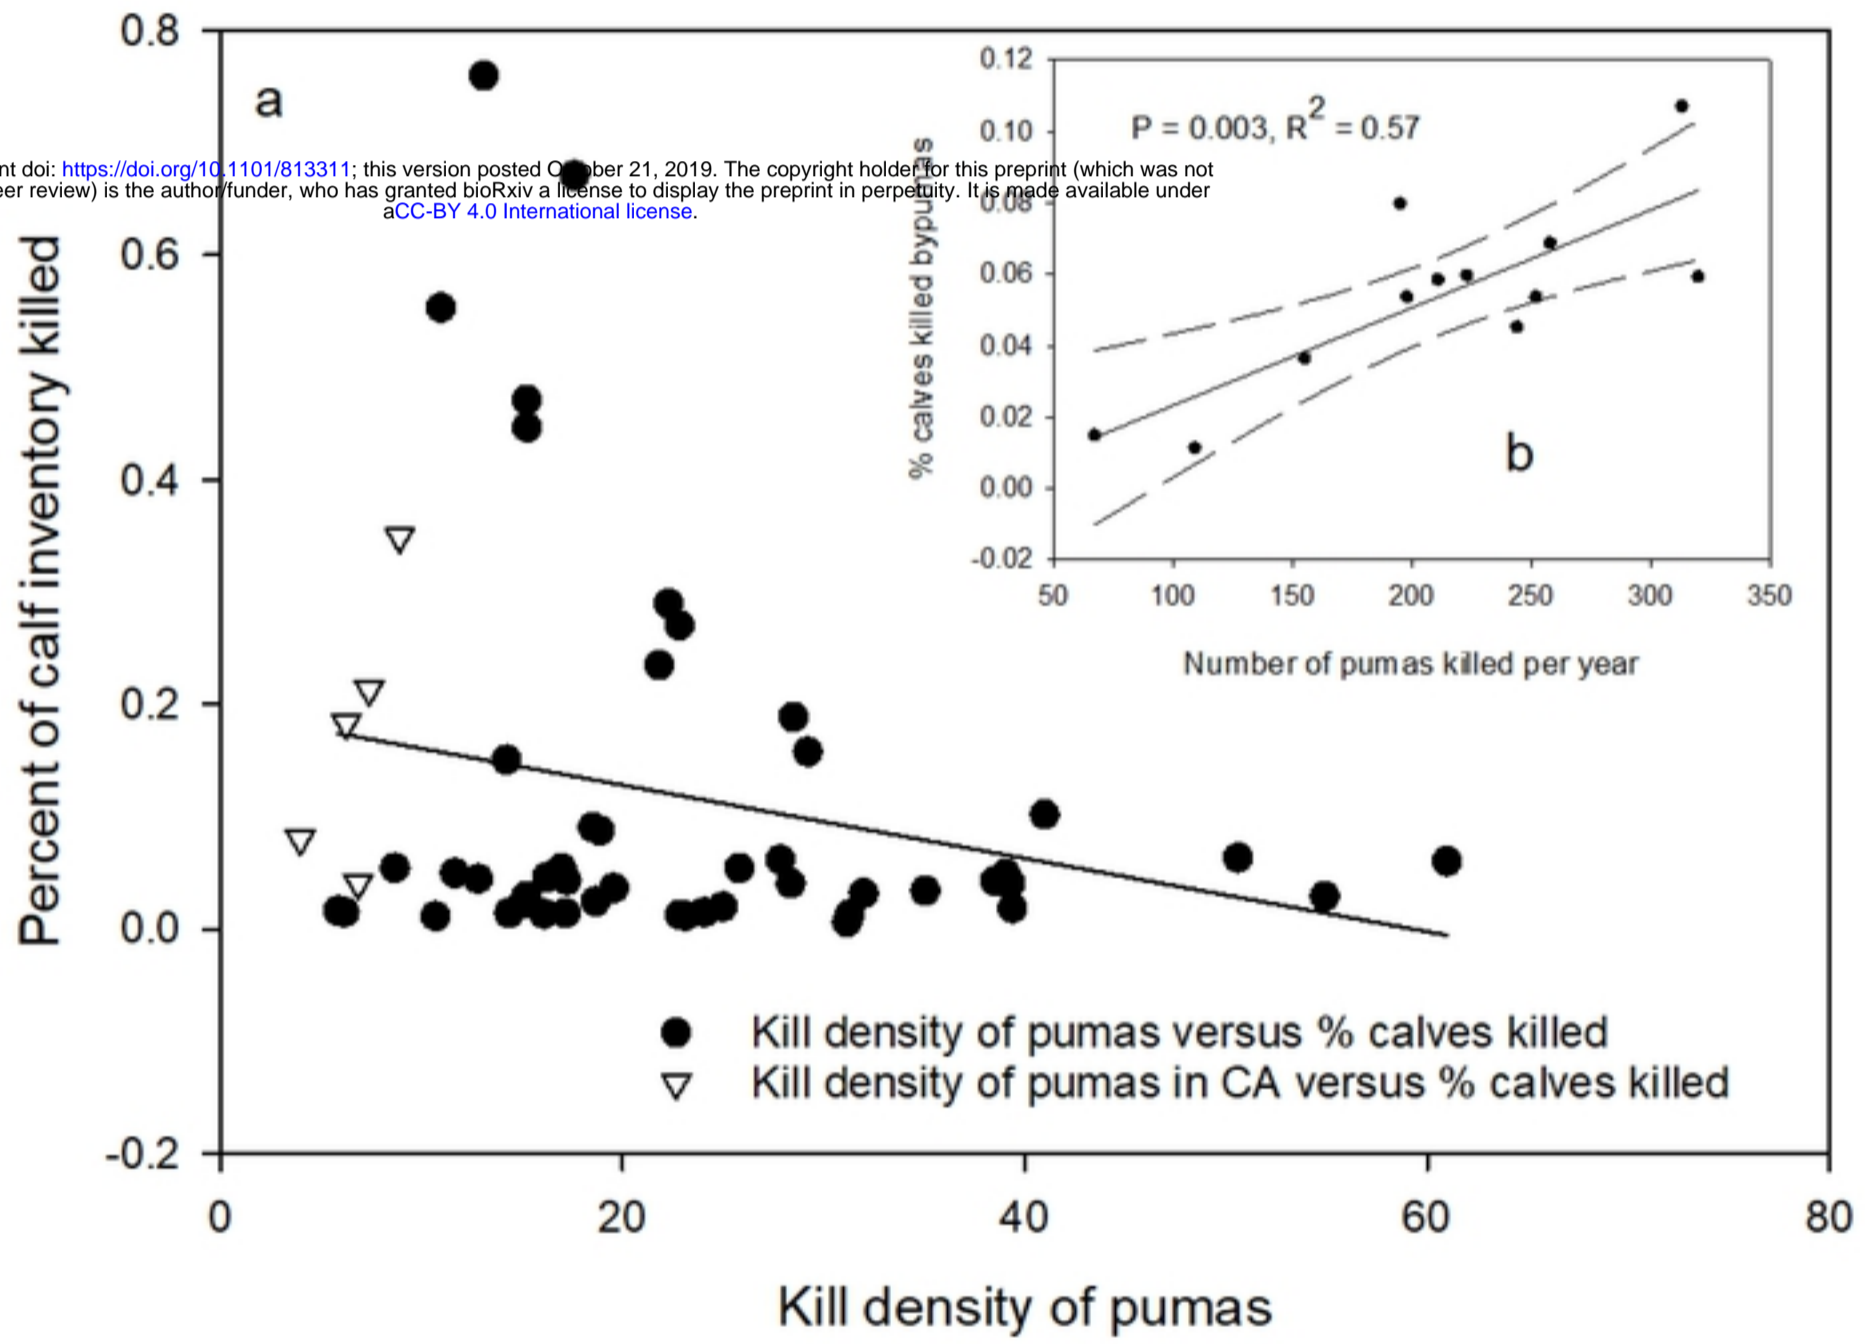

Figure 6

bioRxiv preprint doi: <https://doi.org/10.1101/813311>; this version posted October 21, 2019. The copyright holder for this preprint (which was not certified by peer review) is the author/funder, who has granted bioRxiv a license to display the preprint in perpetuity. It is made available under aCC-BY 4.0 International license.

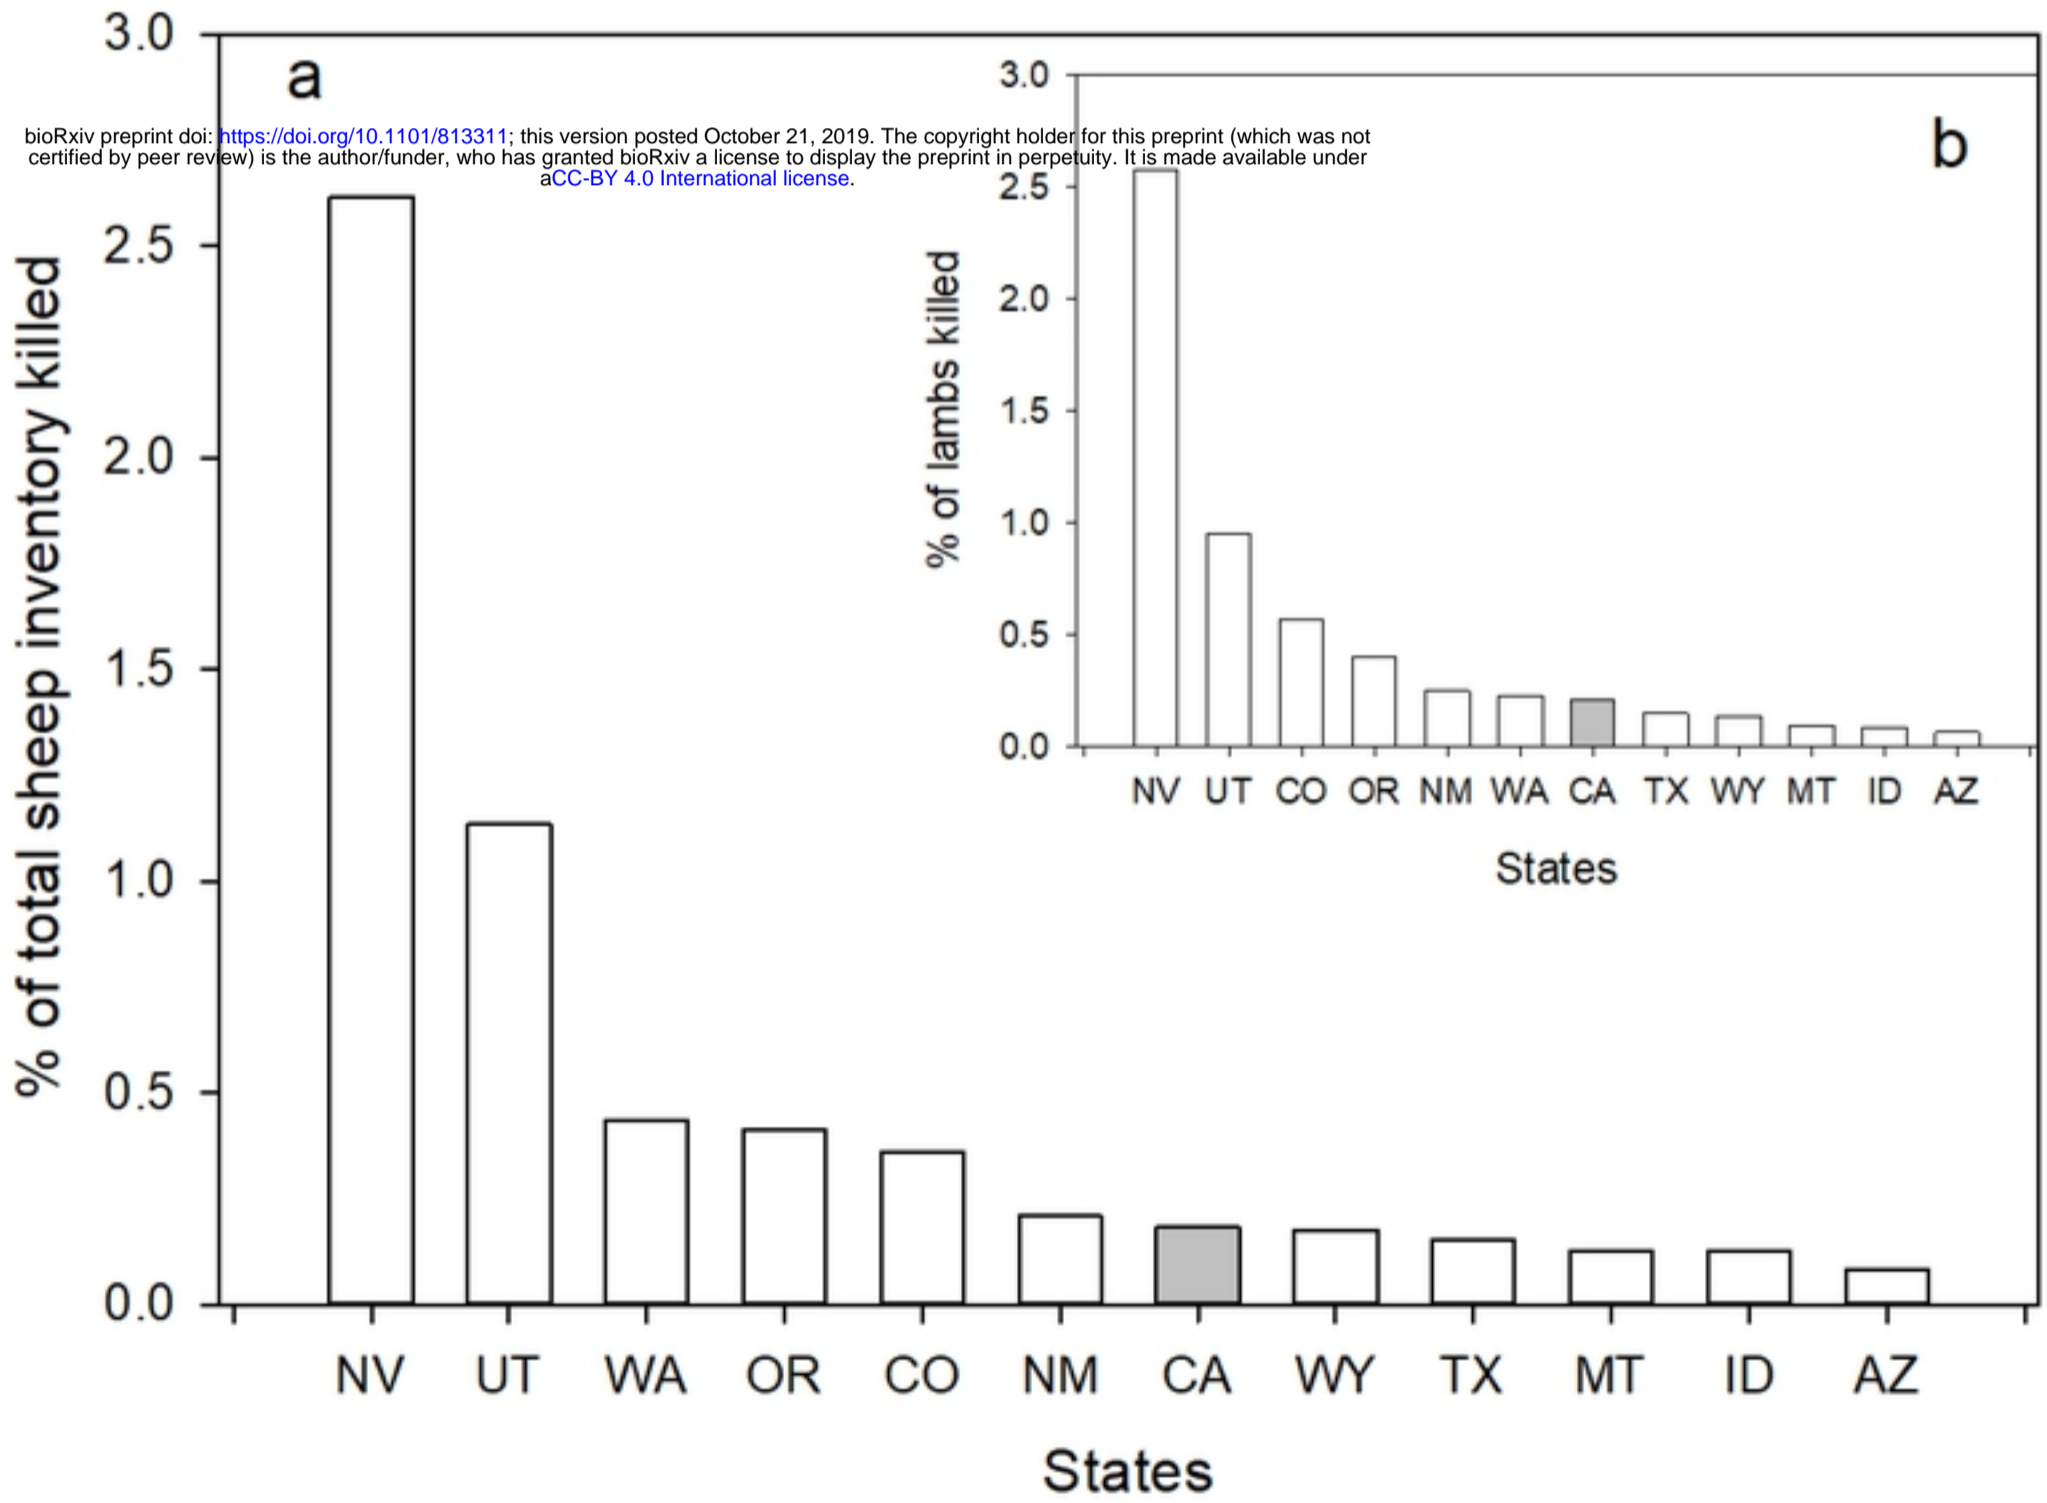

Figure 7

bioRxiv preprint doi: <https://doi.org/10.1101/081331>; this version posted October 21, 2019. The copyright holder for this preprint (which was not certified by peer review) is the author/funder, who has granted bioRxiv a license to display the preprint in perpetuity. It is made available under aCC-BY 4.0 International license.

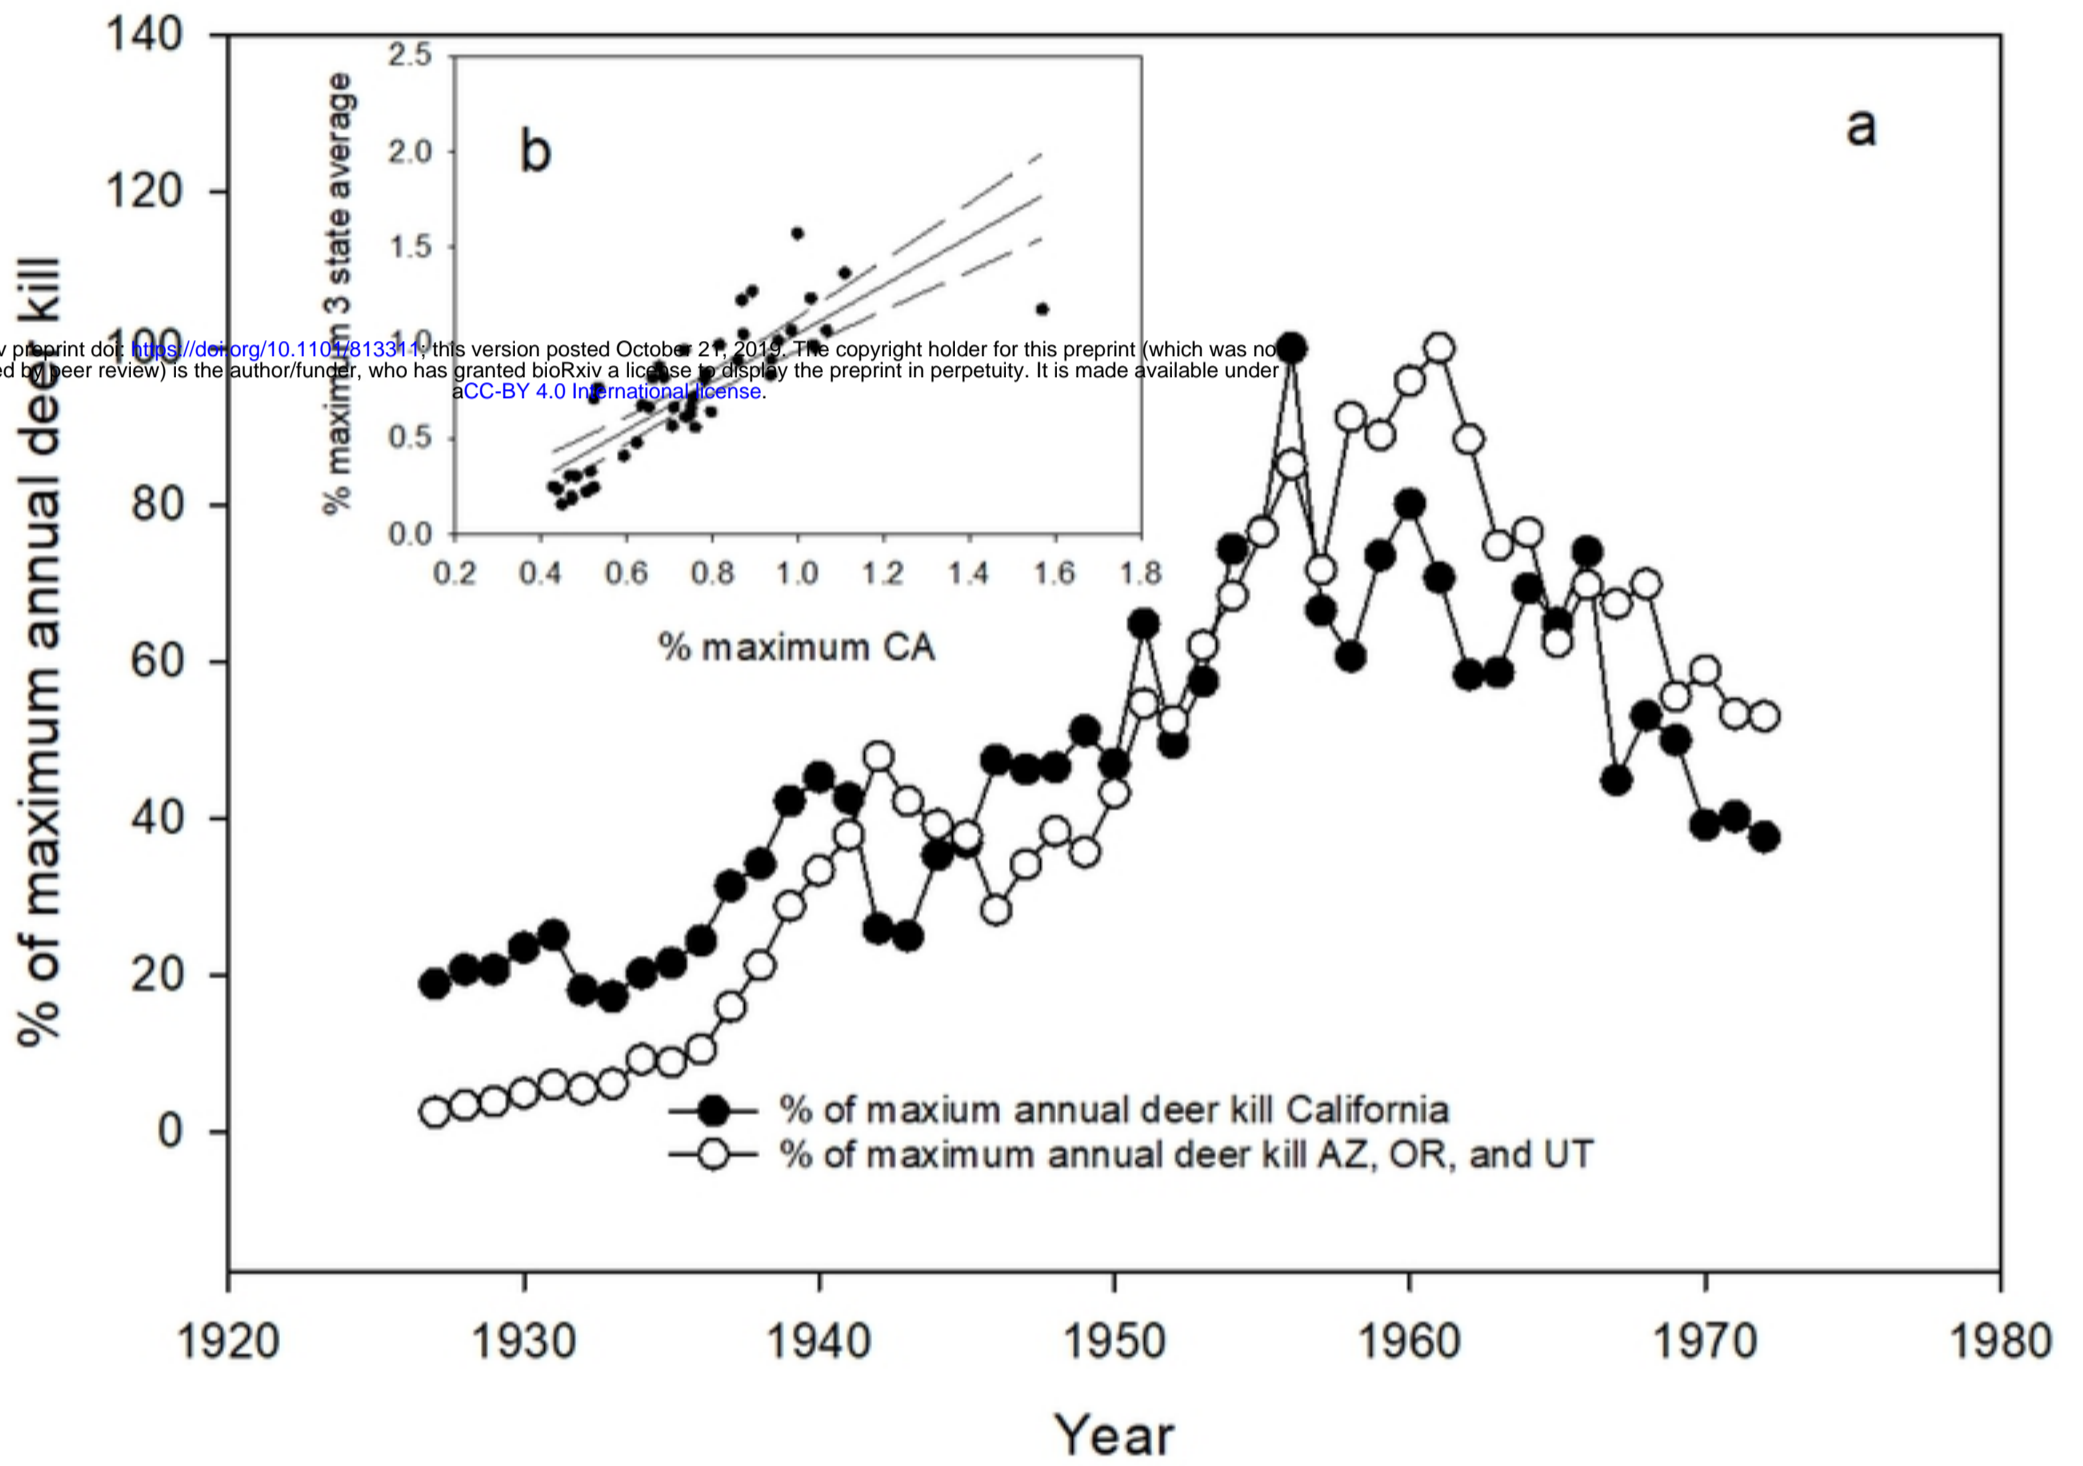

Figure 8

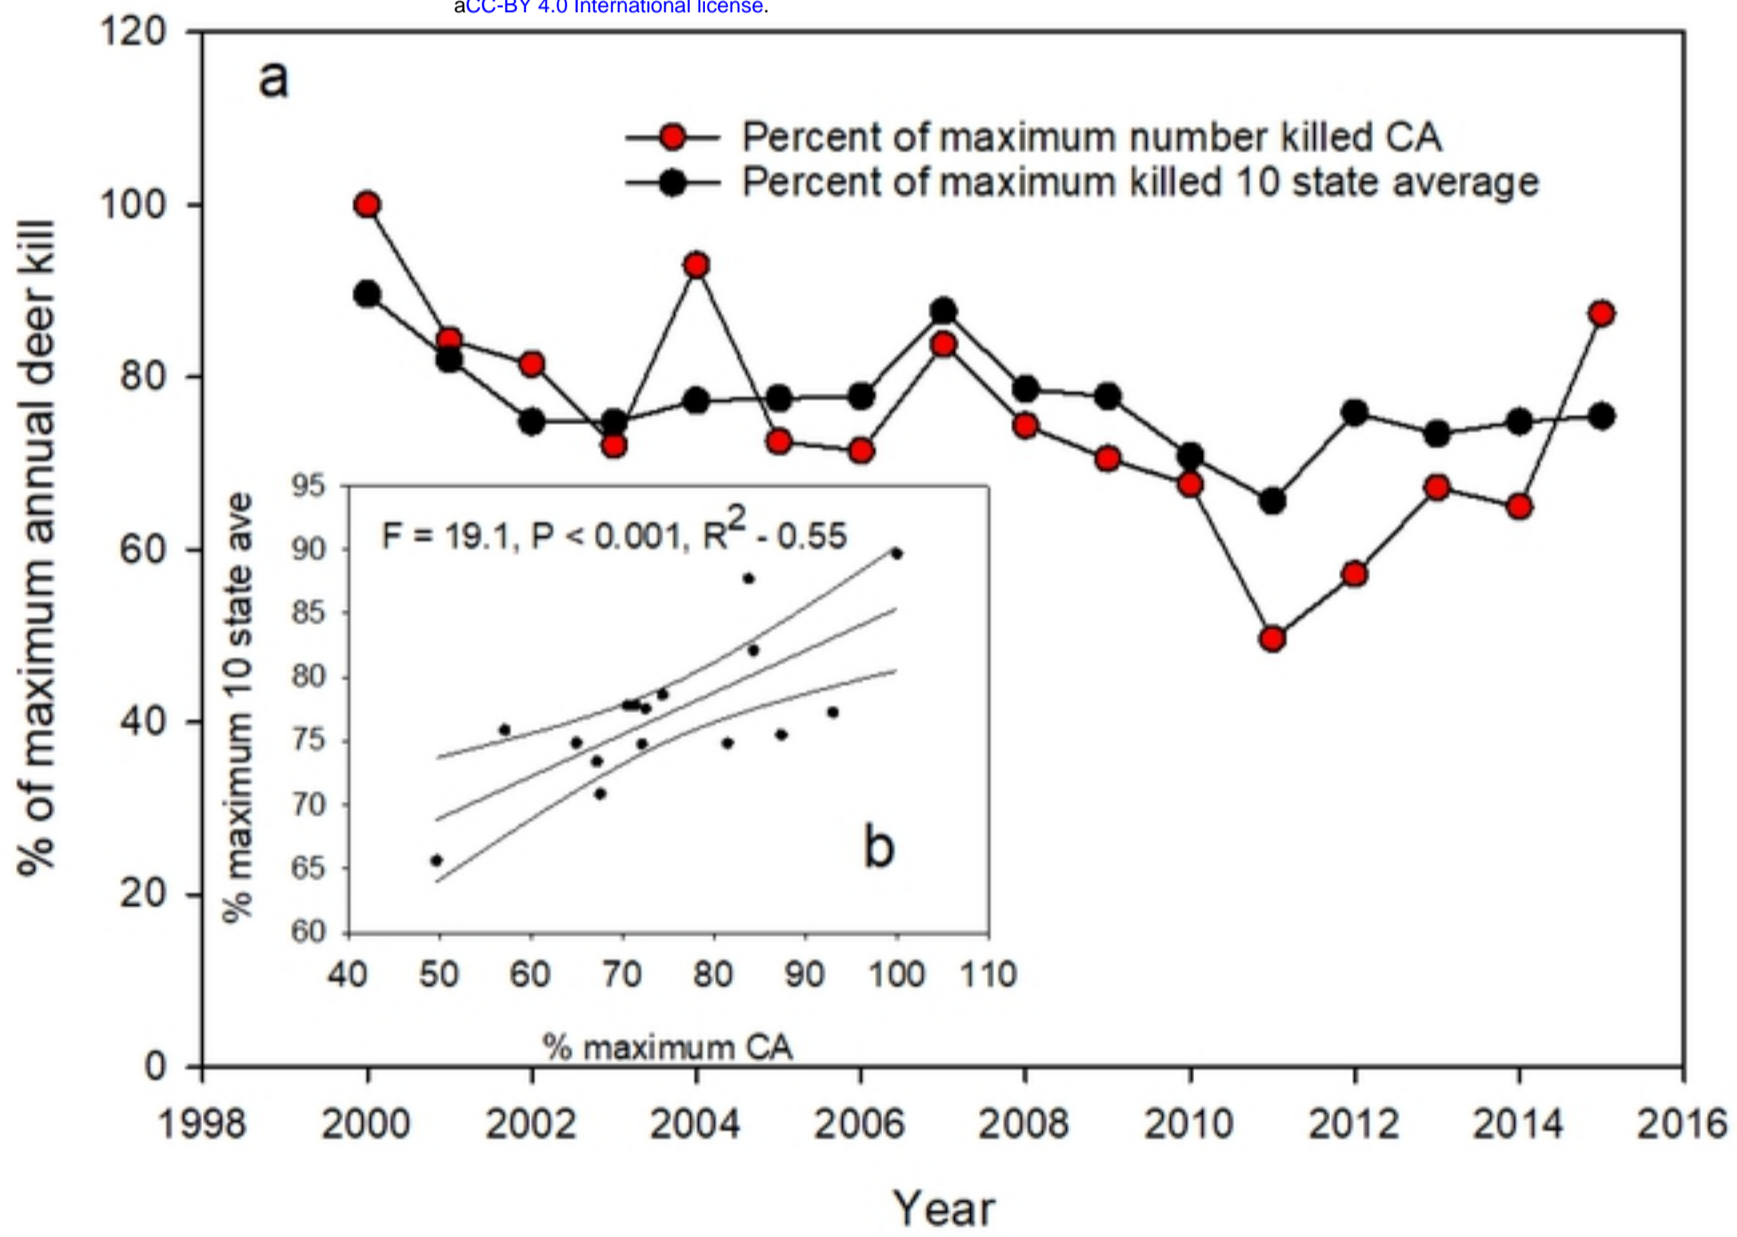

Figure 9



bioRxiv preprint doi: <https://doi.org/10.1101/813311>; this version posted October 21, 2019. The copyright holder for this preprint (which was not certified by peer review) is the author/funder, who has granted bioRxiv a license to display the preprint in perpetuity. It is made available under aCC-BY 4.0 International license.

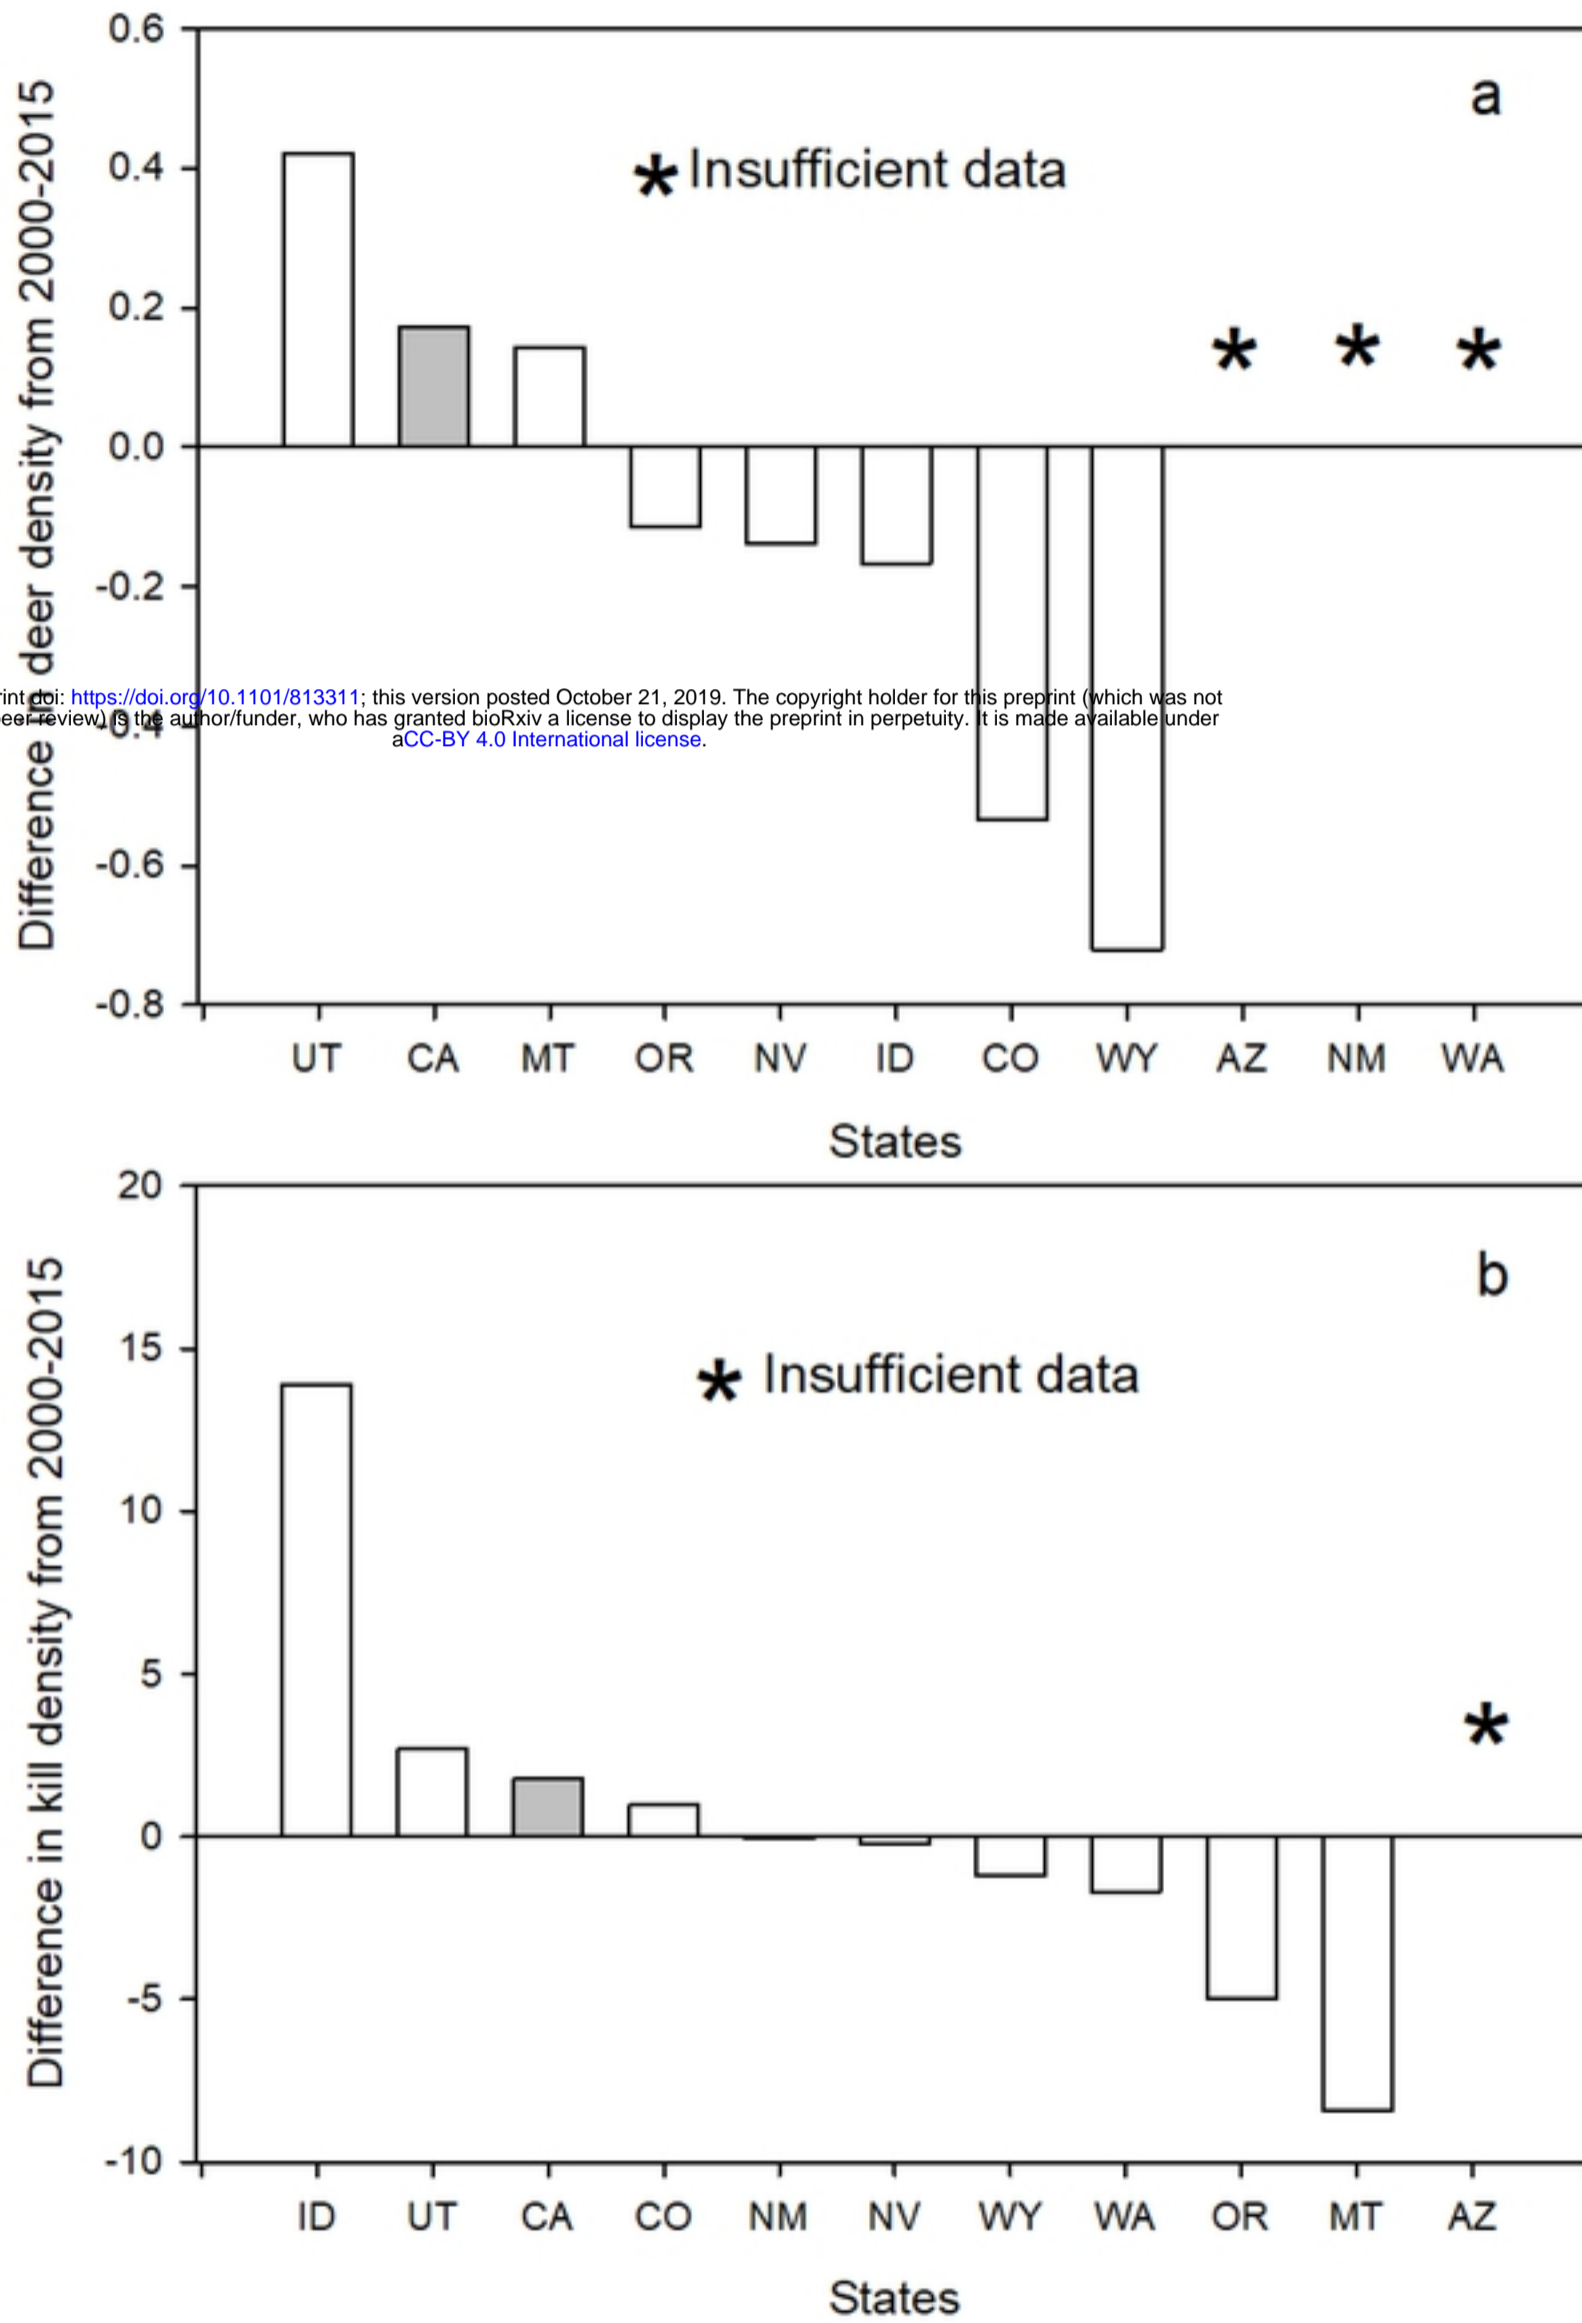

Figure 10

bioRxiv preprint doi: <https://doi.org/10.1101/813311>; this version posted October 21, 2019. The copyright holder for this preprint (which was not certified by peer review) is the author/funder, who has granted bioRxiv a license to display the preprint in perpetuity. It is made available under aCC-BY 4.0 International license.

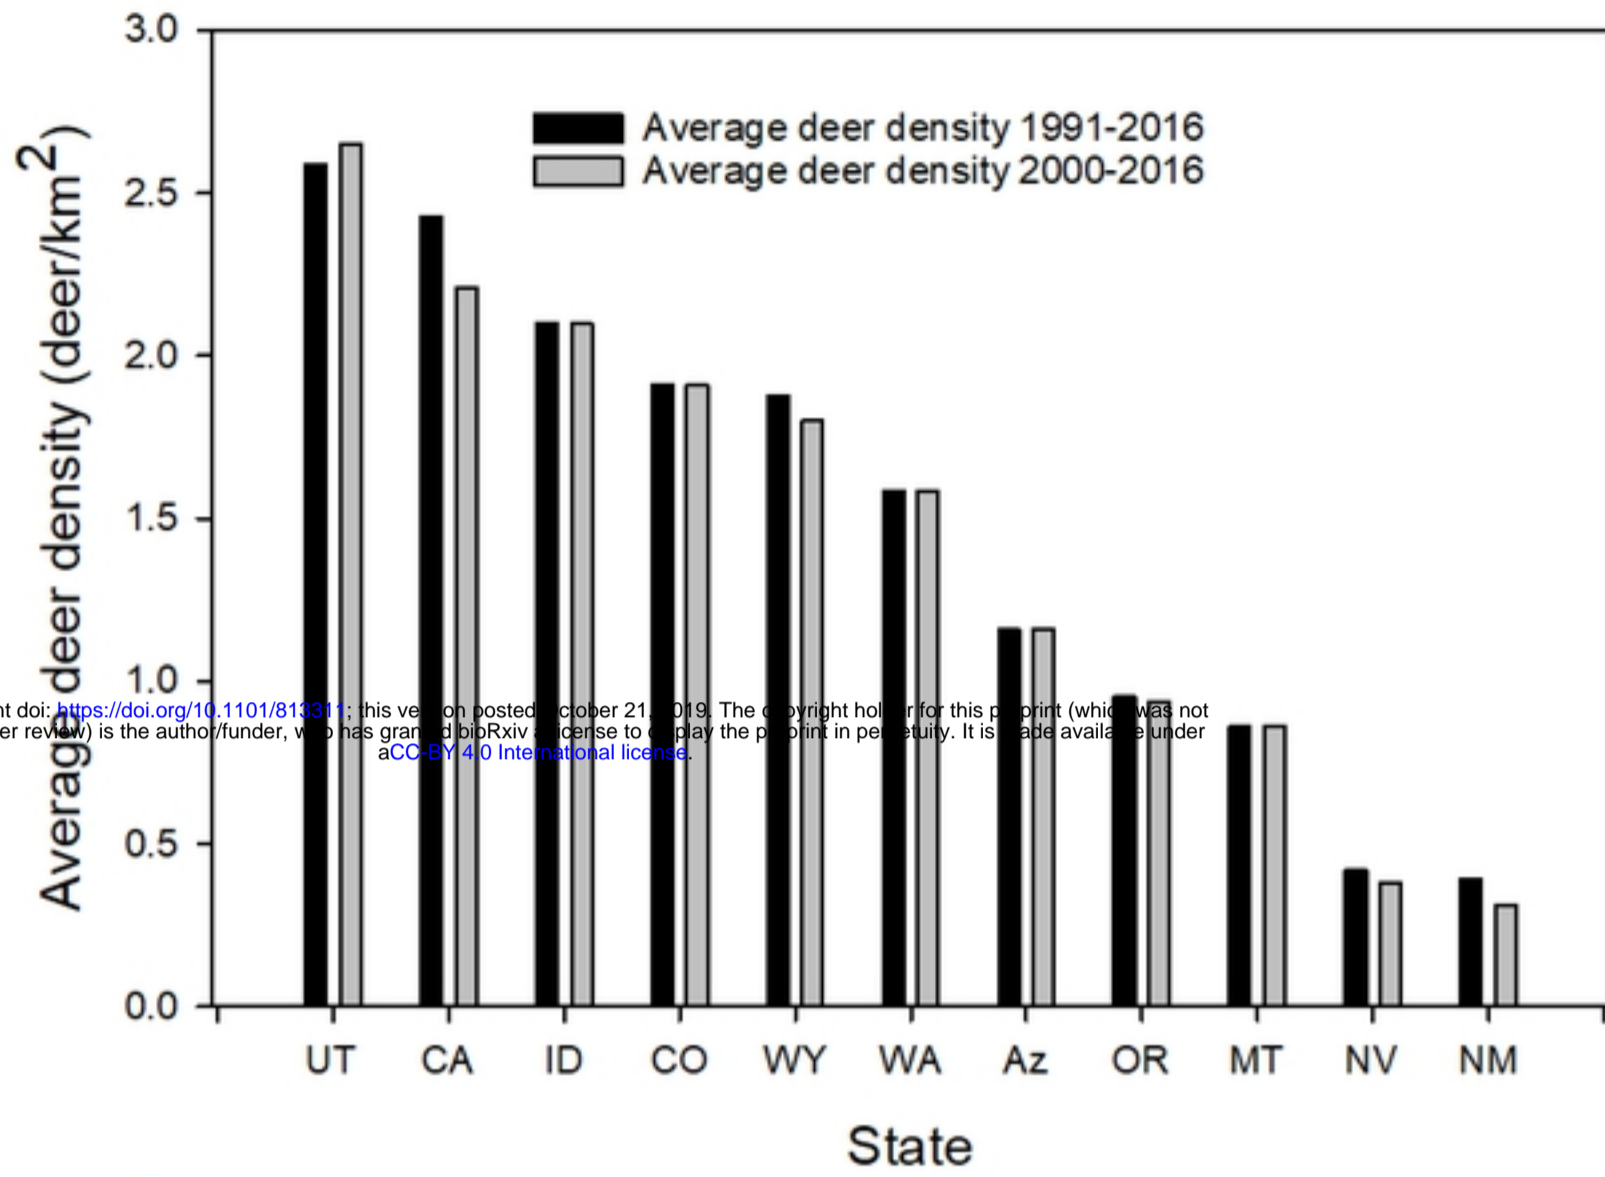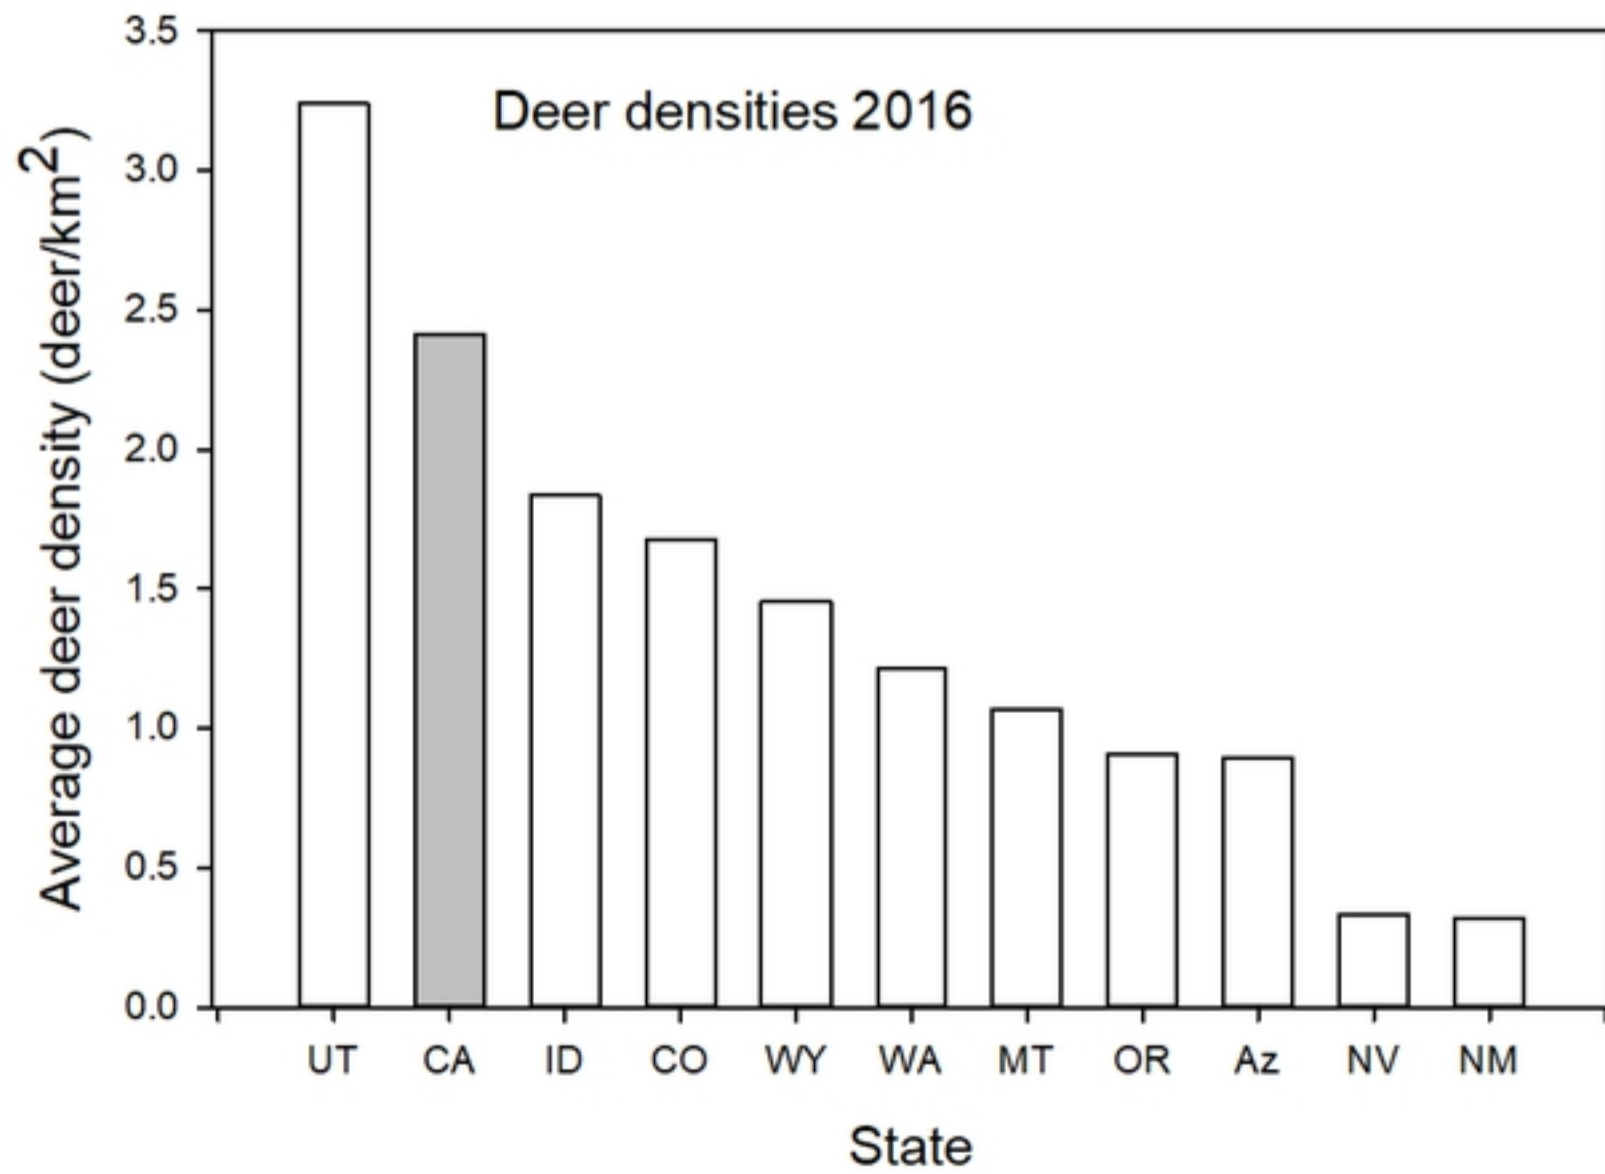

Figure 11

bioRxiv preprint doi: <https://doi.org/10.1101/813311>; this version posted October 21, 2019. The copyright holder for this preprint (which was not certified by peer review) is the author/funder, who has granted bioRxiv a license to display the preprint in perpetuity. It is made available under aCC-BY 4.0 International license.

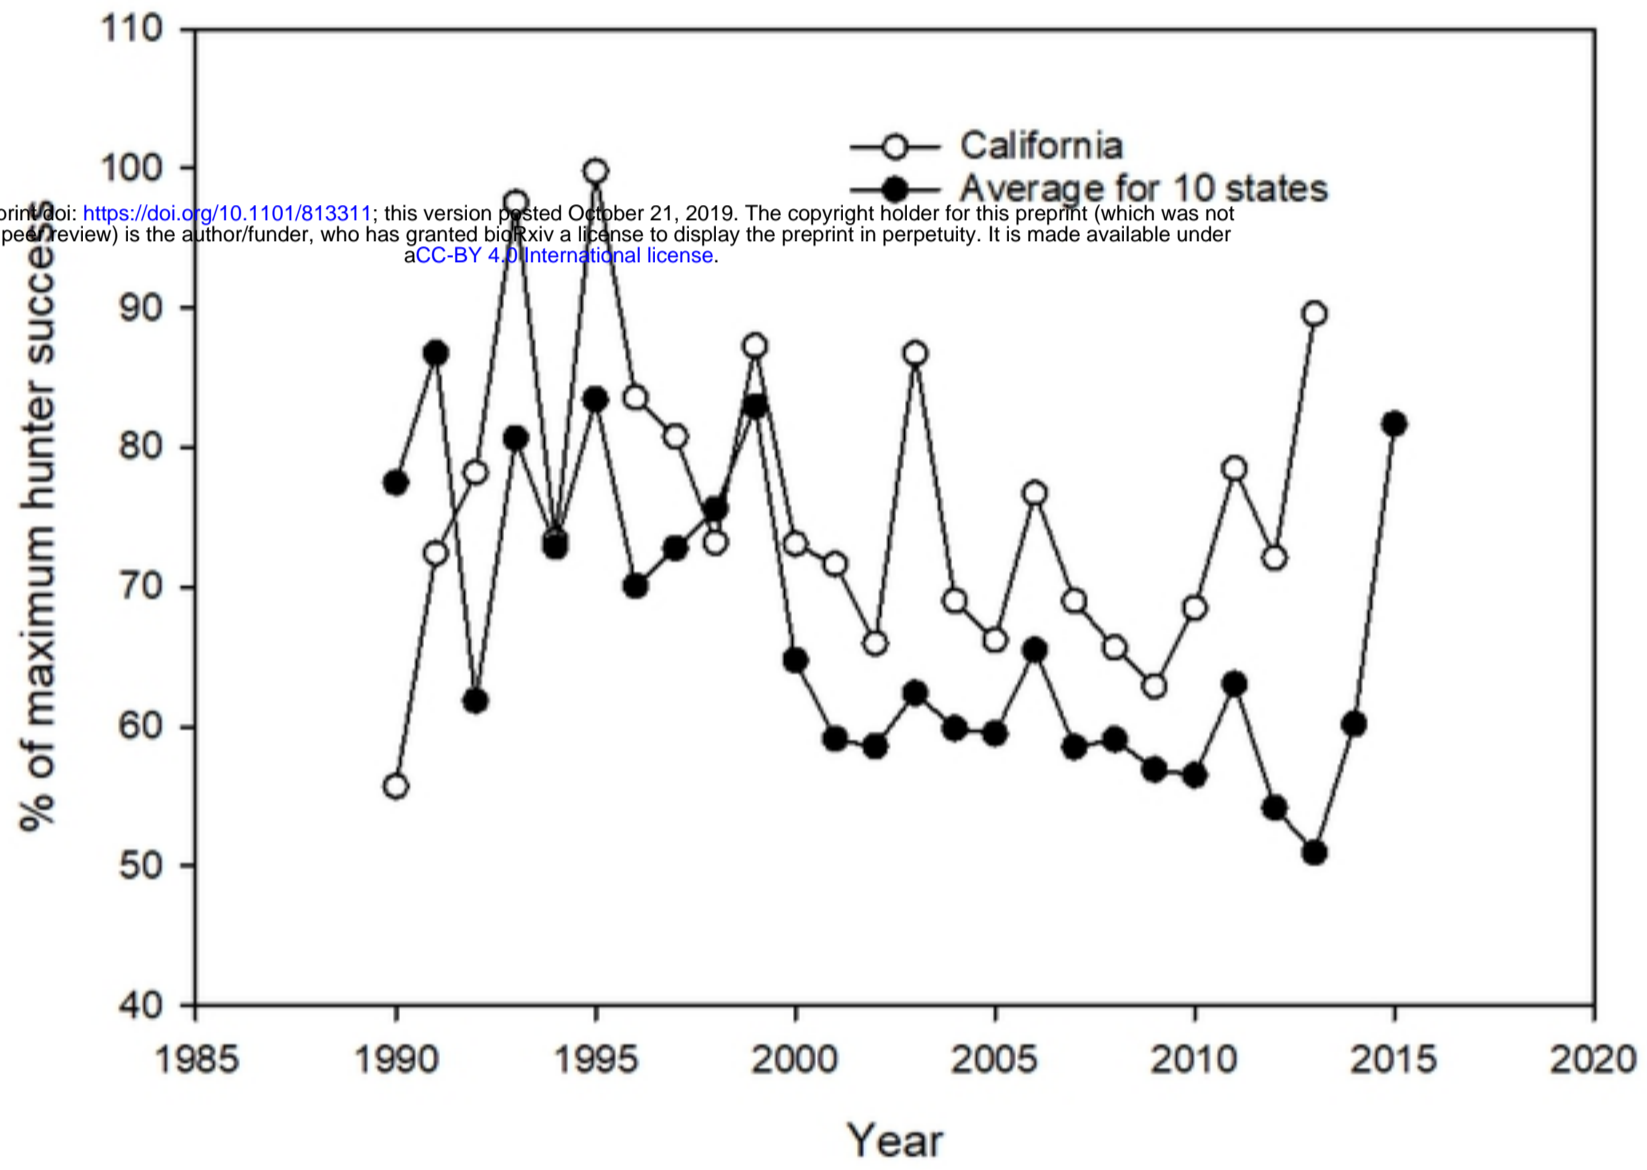

Figure 12

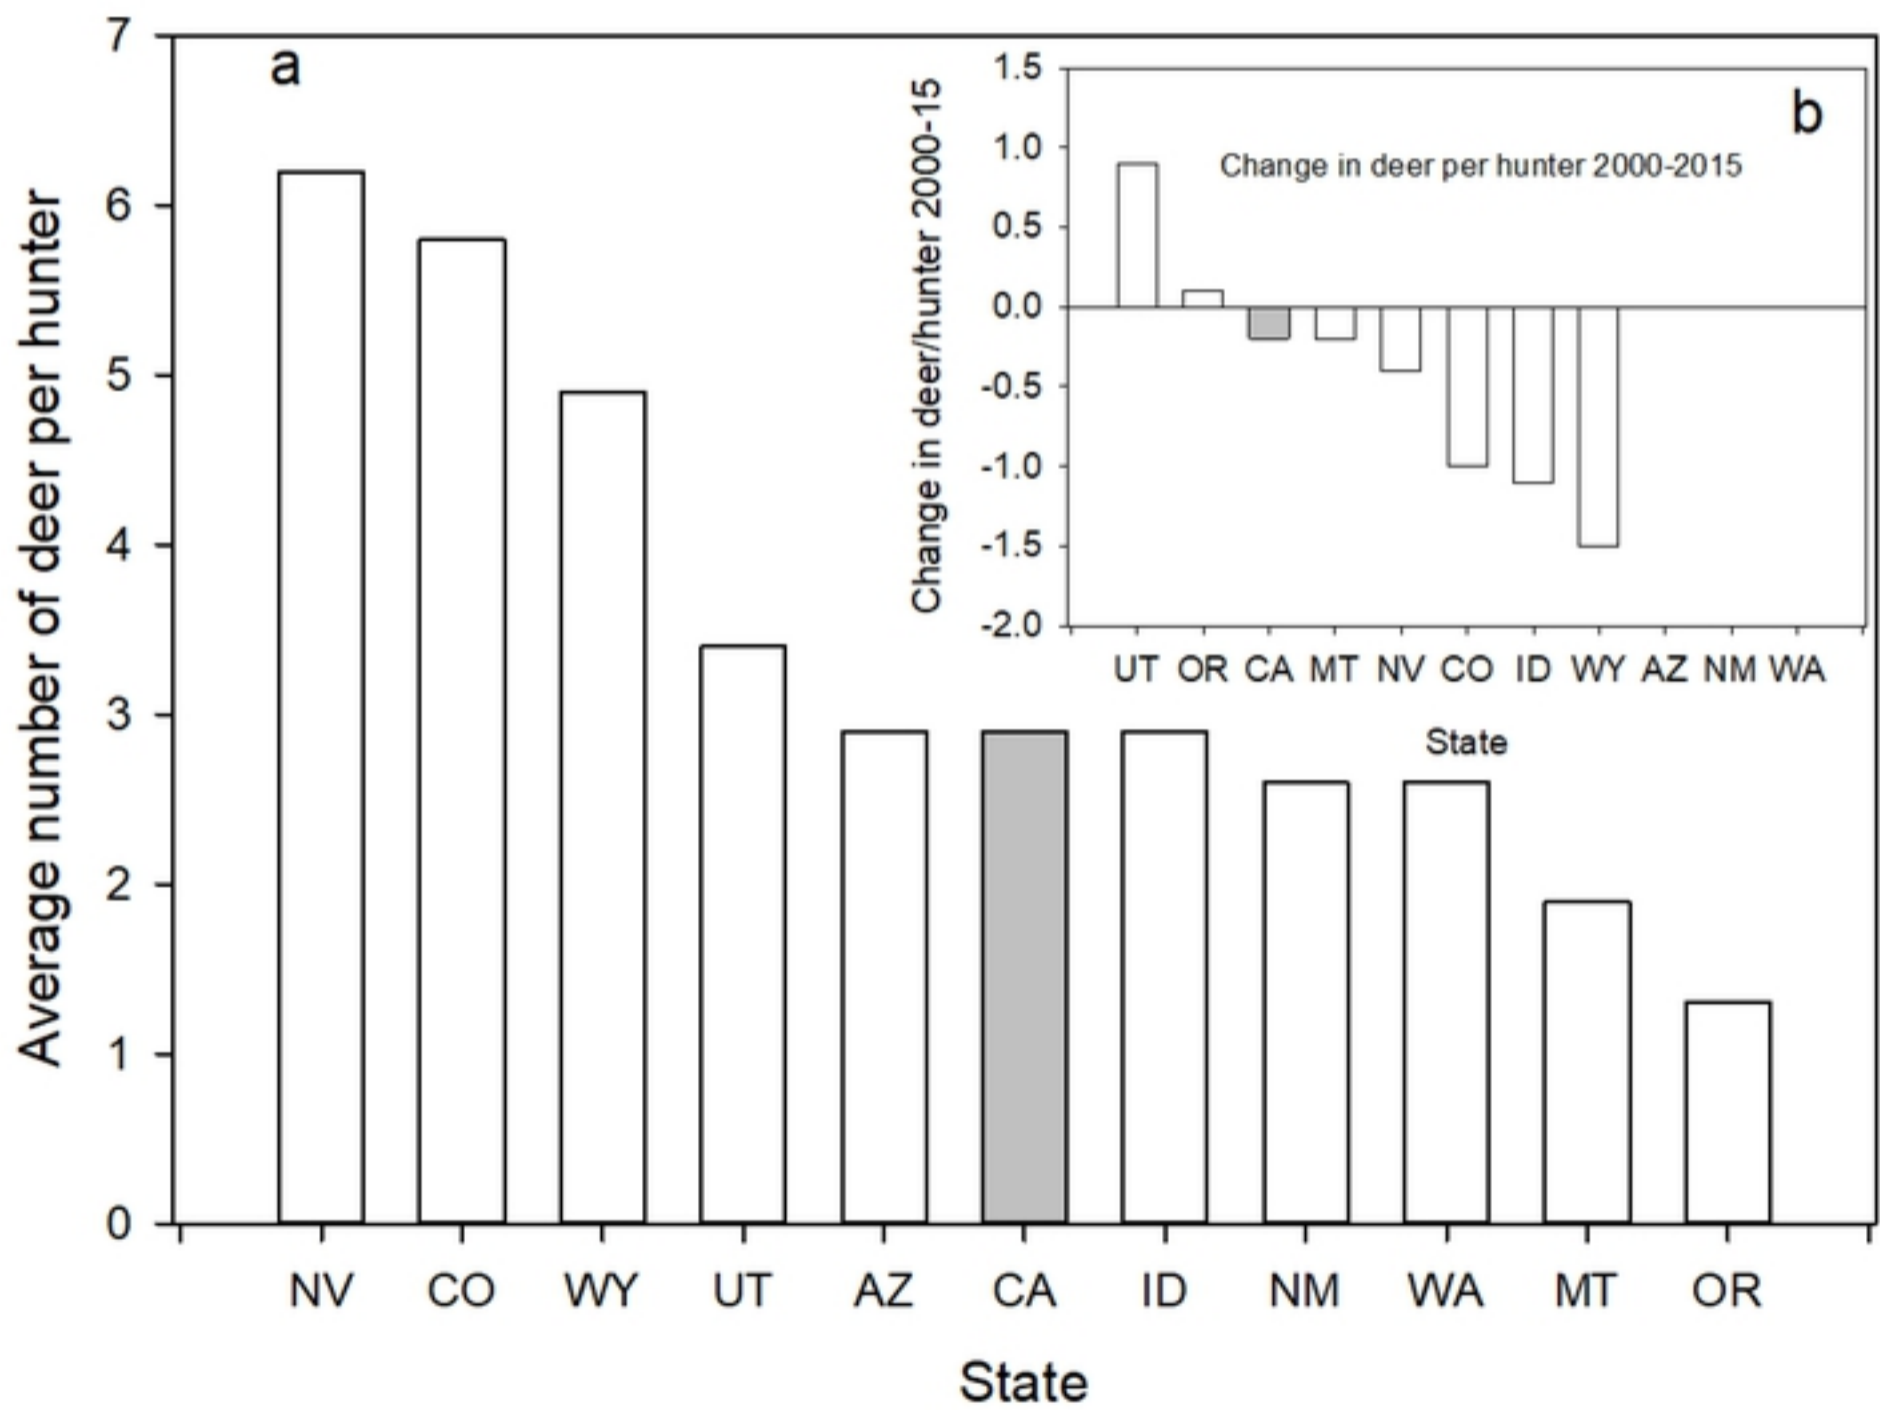

Figure 13
